# Supplementary material for: Enantioselective synthesis of 4-substituted tetrahydroisoquinolines via palladium-catalyzed intramolecular Friedel–Crafts type allylic alkylation of phenols
Source: Royal Society of Chemistry journal article supplement (doi:10.1039/c4ob02574a), 2015-01-01
Supplement: c4ob02574a1.pdf [file c4ob02574a1.pdf]

Enantioselective Synthesis of 4-Substituted Tetrahydroisoquinolines *via*  
Palladium-Catalyzed Intramolecular Friedel-Crafts Type Allylic  
Alkylation of Phenols

Zheng-Le Zhao<sup>a,b</sup>, Qing Gu<sup>b</sup>, Xin-Yan Wu<sup>a\*</sup> and Shu-Li You<sup>a,b\*</sup>

<sup>a</sup> Key Laboratory for Advanced Materials and Institute of Fine Chemicals, East China University of Science and Technology, Shanghai 200237, China

<sup>b</sup> State Key Laboratory of Organometallic Chemistry Shanghai Institute of Organic Chemistry, Chinese Academy of Sciences 345 Lingling Lu, Shanghai 200032, China  
Fax (+86) 21-54925087; E-mail: xinyanwu@ecust.edu.cn, or slyou@sioc.ac.cn

## Table of Contents

|                                                                       |        |
|-----------------------------------------------------------------------|--------|
| General Methods                                                       | S2     |
| General Procedure for Synthesis of the Substituted Allylic Carbonates | S3     |
| General Procedure for Palladium-Catalyzed Intramolecular              |        |
| Enantioselective Allylic Alkylation Reaction                          | S4     |
| Copies of NMR Spectra and HPLC                                        | S5-S33 |

**General Methods.** Unless stated otherwise, all reactions were carried out in flame-dried glassware under a dry argon atmosphere. All solvents were purified and dried according to standard methods prior to use.

$^1\text{H}$  and  $^{13}\text{C}$  NMR spectra were recorded on a Varian instrument (300, 400 MHz and 75, 100 MHz, respectively) and internally referenced to tetramethylsilane signal or residualprotio solvent signals. Data for  $^1\text{H}$  NMR are recorded as follows: chemical shift ( $\delta$ , ppm), multiplicity (s = singlet, d = doublet, t = triplet, m = multiplet or unresolved, br = broad singlet, coupling constant(s) in Hz, integration). Data for  $^{13}\text{C}$  NMR are reported in terms of chemical shift ( $\delta$ , ppm).

The Trost ligands<sup>1</sup>, the substituted phenol amines and (*E*)-4-bromo-but-2-enyl methyl ester<sup>2</sup> were prepared according to the reported procedures.

(1) (a) Trost, B. M.; Van Vranken, D. L.; Bingel, C. *J. Am. Chem. Soc.* **1992**, *114*, 9327. (b) Trost, B. M.; Van Vranken, D. L. *Angew. Chem., Int. Ed. Engl.* **1992**, *31*, 228.

(2) Trost, B. M.; Sacchi, K. L.; Schroeder, G. M.; Asakawa, N. *Org. Lett.* **2002**, *4*, 3427.

### General Procedure for Synthesis of the Substituted Allylic Carbonates

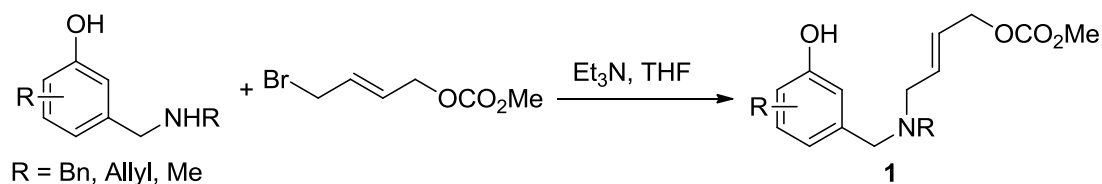

Substrates **1a-j**, **1o** were prepared according to the previously reported methods (refer to: *Org. Lett.* **2012**, *14*, 2579.).

To a solution of the substituted phenol amine (2.0 mmol, 1.0 equiv) and Et<sub>3</sub>N (0.33 mL, 2.4 mmol, 1.2 equiv) in dry THF (25 mL), carbonic acid (*E*)-4-bromo-but-2-enyl methyl ester (836 mg, 4.0 mmol, 2.0 equiv) was added at 0 °C. The ice bath was then removed and the reaction mixture was stirred at room temperature for 6-12 h. After the reaction was complete (monitored by TLC), the crude reaction mixture was filtrated through a pad of celite and washed with EtOAc. The solvents were removed under reduced pressure. The residue was purified by silica gel column chromatography (PE/EA = 6/1) to afford the desired product **1**.

## General Procedure for Palladium-Catalyzed Intramolecular Enantioselective Allylic Alkylation Reaction

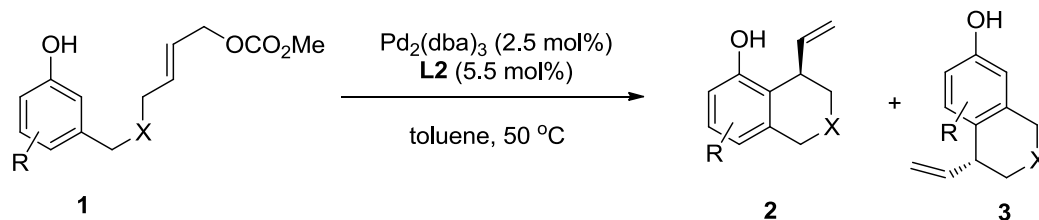

To a flame-dried Schlenk tube under argon, Pd<sub>2</sub>(dba)<sub>3</sub> (6.9 mg, 0.0075 mmol, 2.5 mol %), (1*R*, 2*R*)-DACH-phenyl Trost ligand (**L2**) (12 mg, 0.018 mmol, 5.5 mol%), toluene (1 mL) was added. The reaction mixture was heated at 50 °C for 30 min, after that allyl carbonate **1** (0.30 mmol, dissolved in 1.0 mL toluene) was added. The reaction mixture was stirred at 50 °C. After the reaction was complete (monitored by TLC), the crude reaction mixture was filtrated through a pad of celite and washed with EtOAc. Then the solvent were removed under reduced pressure. The **2/3** ratio was determined by <sup>1</sup>H NMR of the crude reaction mixture. Then the residue was purified by silica gel column chromatography (PE/EA = 8/1) to afford the desired products **2** and **3**.

# Copies of NMR Spectra and HPLC

## 1k

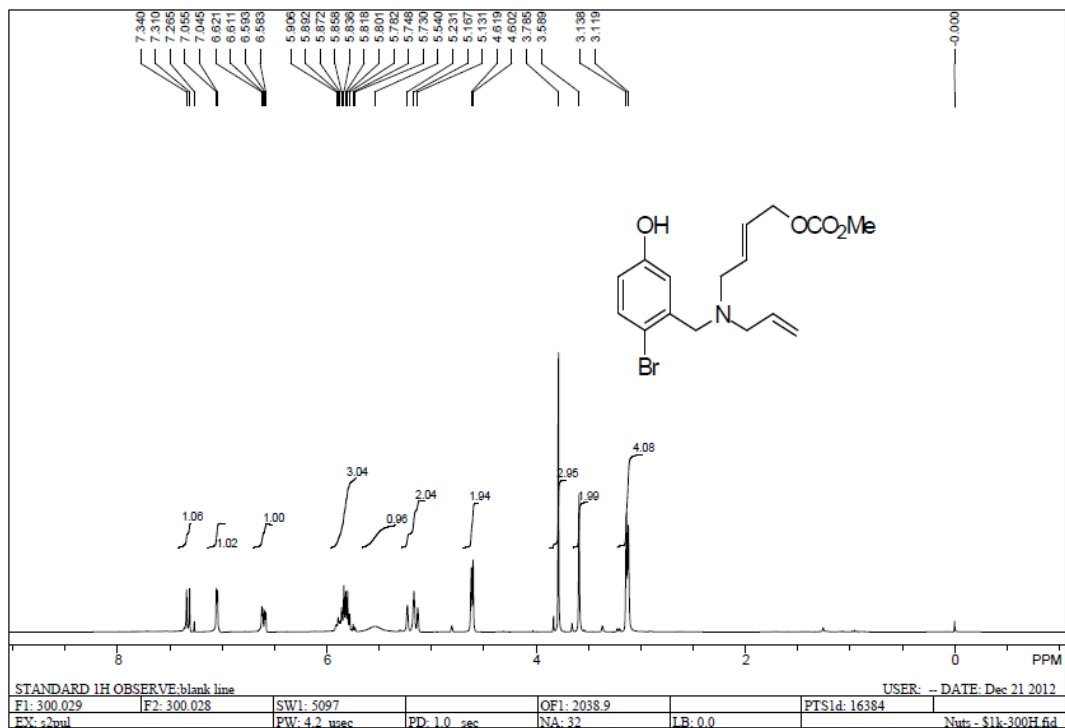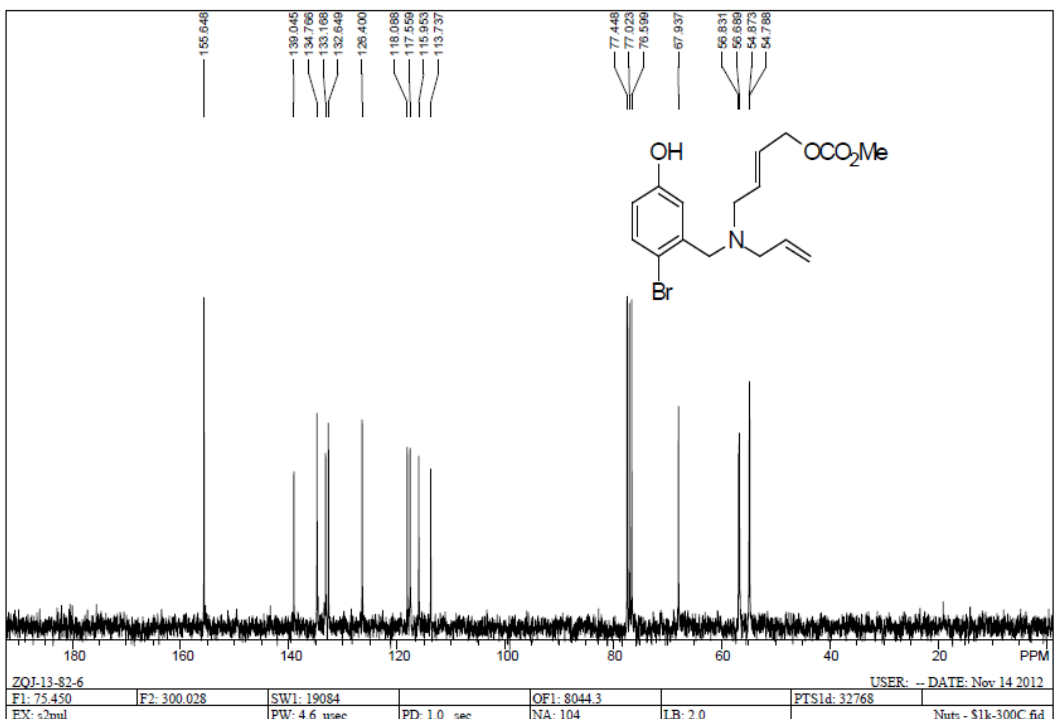

11

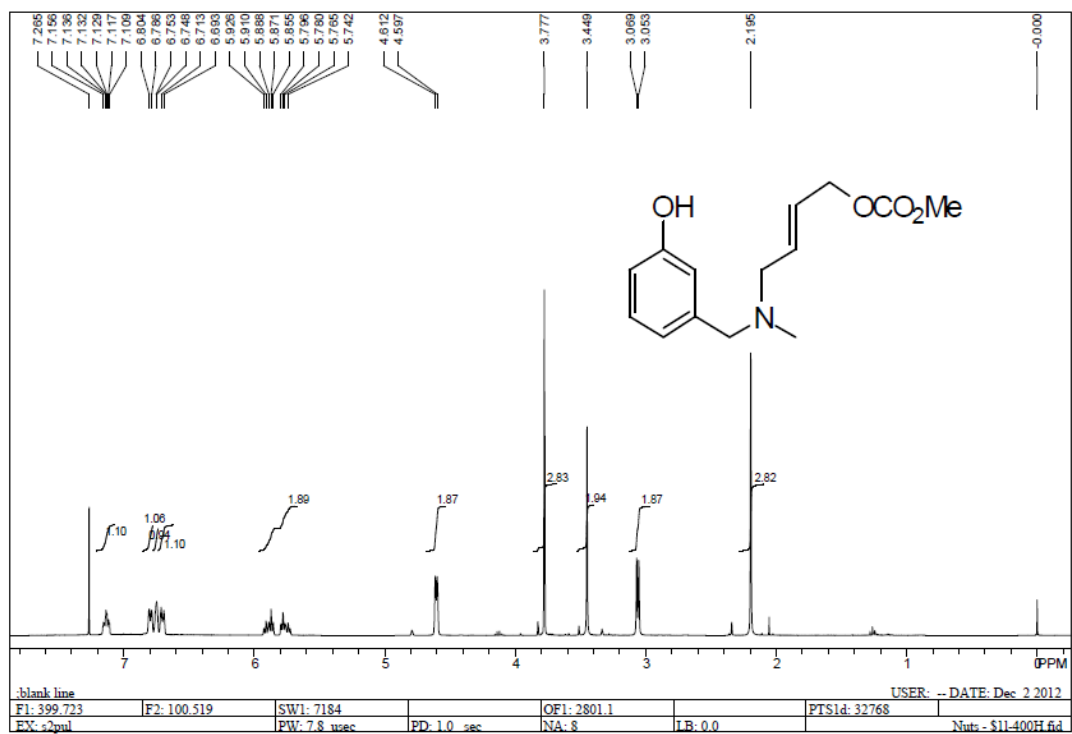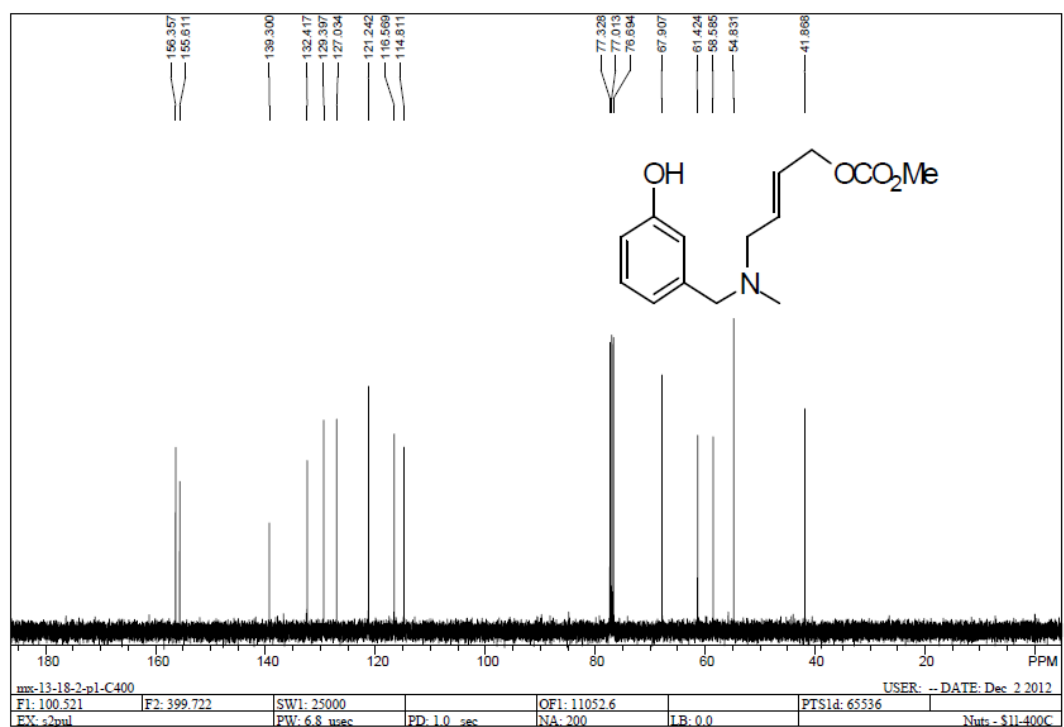

1m

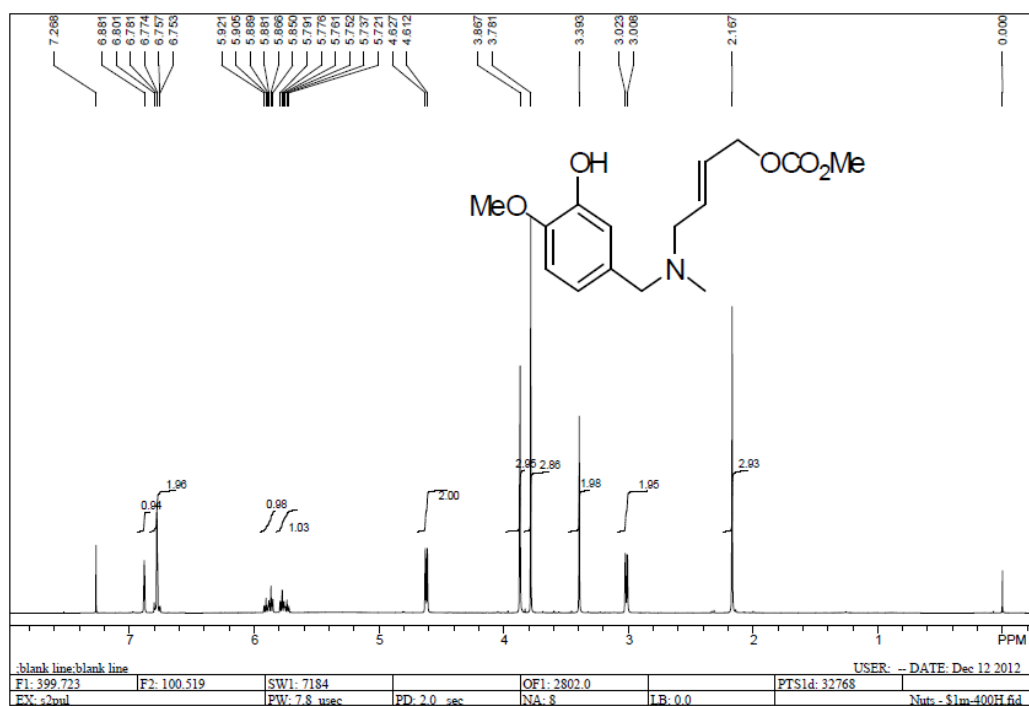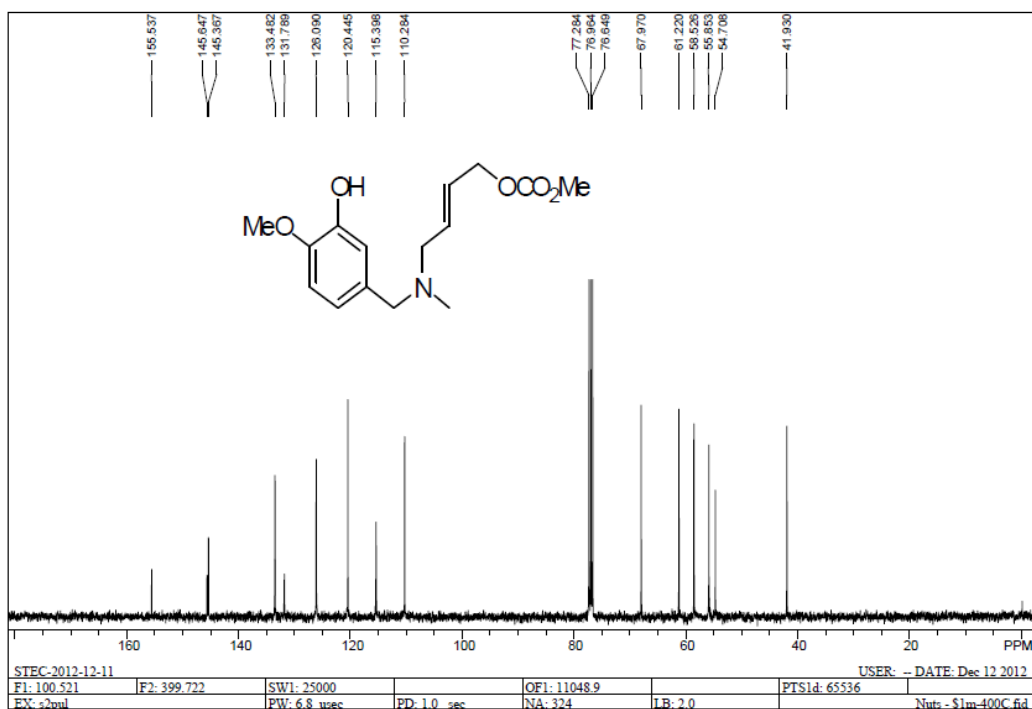

1n

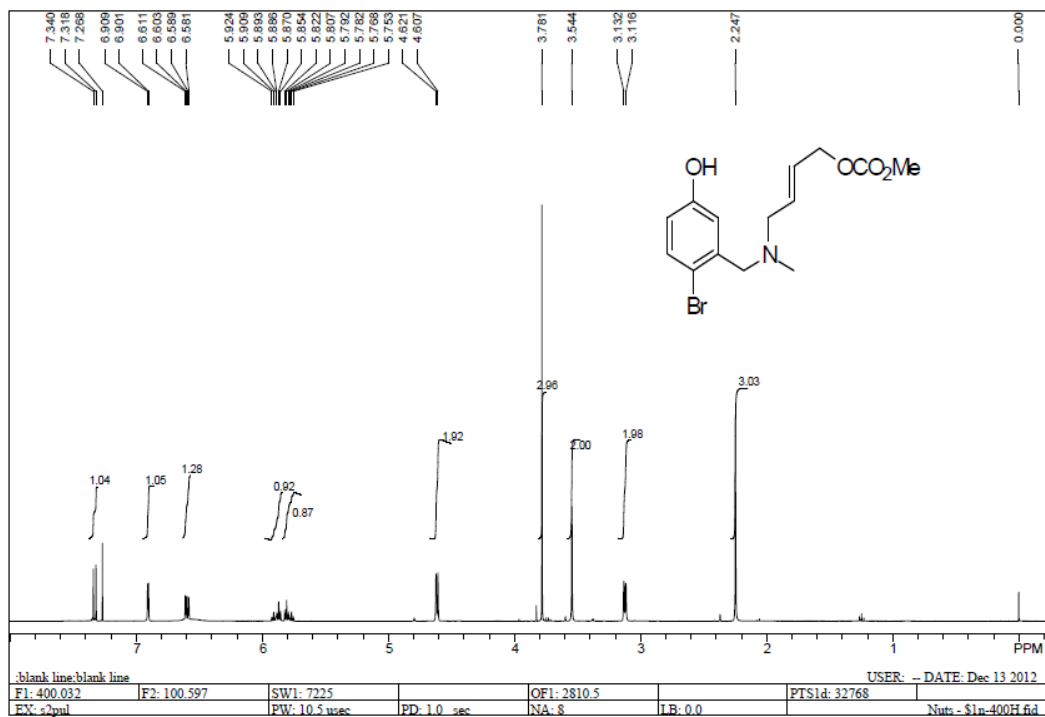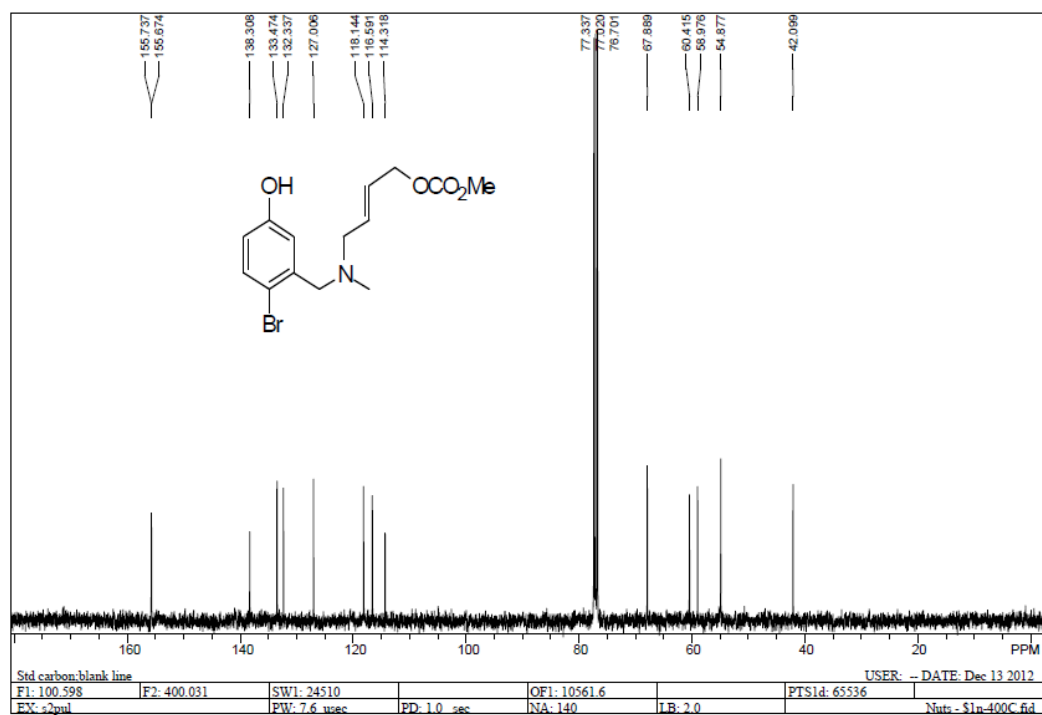



2a

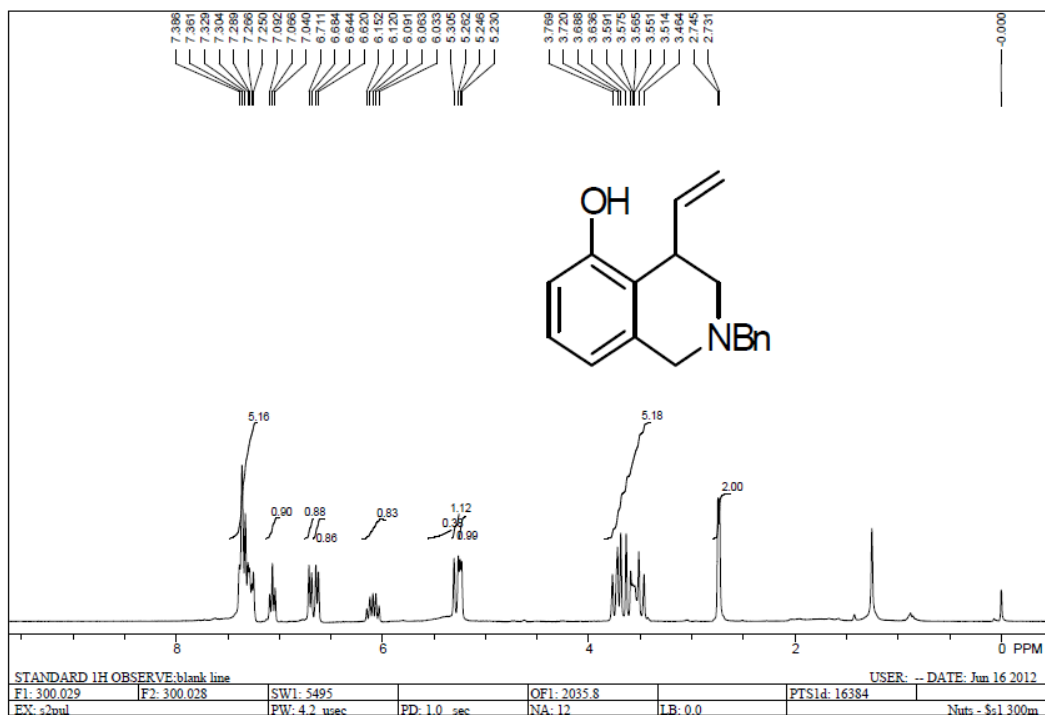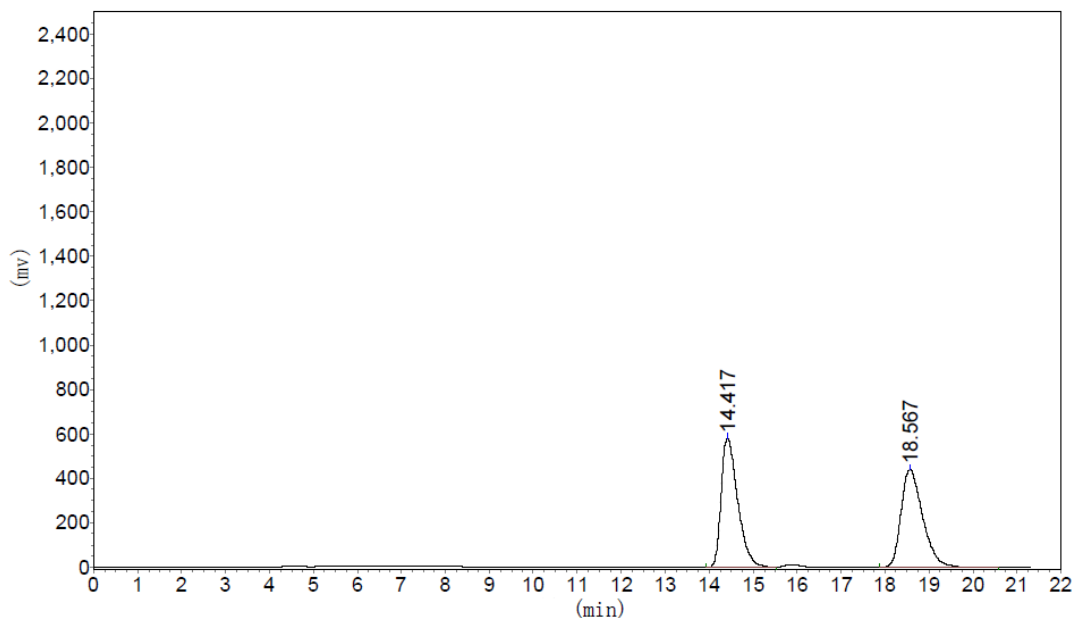

| Peak No.     | R. Time | Peak Height | Peak Area    | Percent  |
|--------------|---------|-------------|--------------|----------|
| 1            | 14.417  | 579699.125  | 15021199.000 | 50.2033  |
| 2            | 18.567  | 438363.188  | 14899569.000 | 49.7967  |
| <b>Total</b> |         | 1018062.313 | 29920768.000 | 100.0000 |

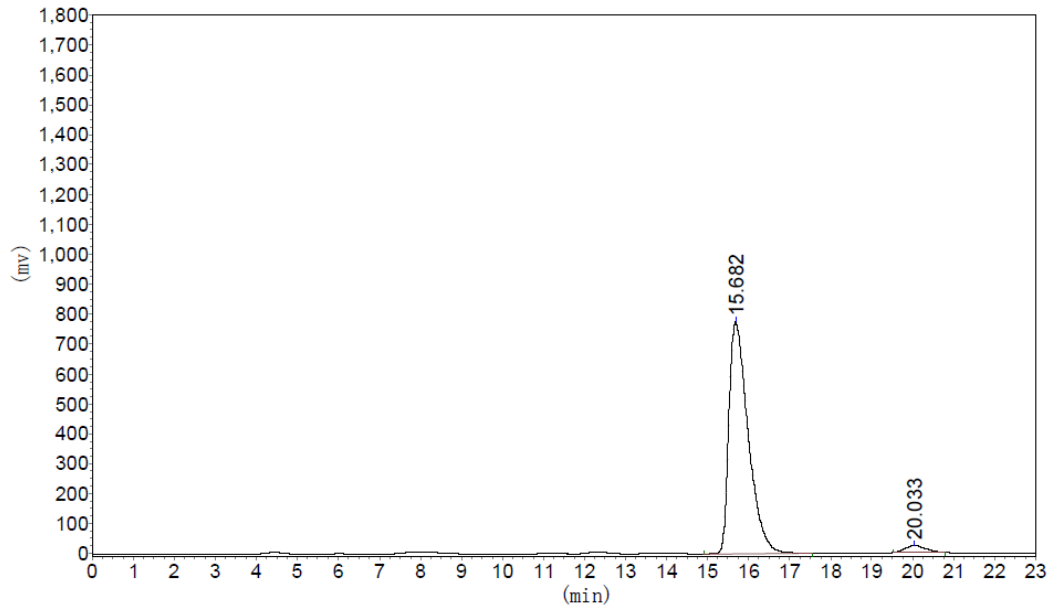

| Peak No.     | R. Time | Peak Height | Peak Area    | Percent  |
|--------------|---------|-------------|--------------|----------|
| 1            | 15.682  | 774587.188  | 25364782.000 | 96.5331  |
| 2            | 20.033  | 24677.736   | 910958.563   | 3.4669   |
| <b>Total</b> |         | 799264.924  | 26275740.563 | 100.0000 |

2b

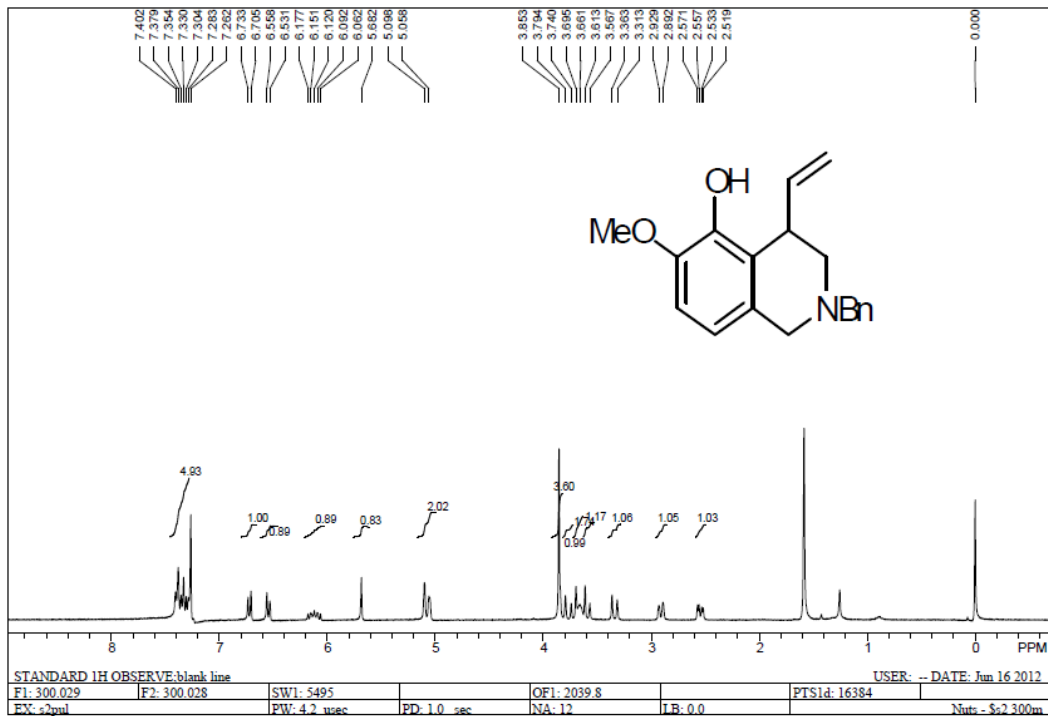

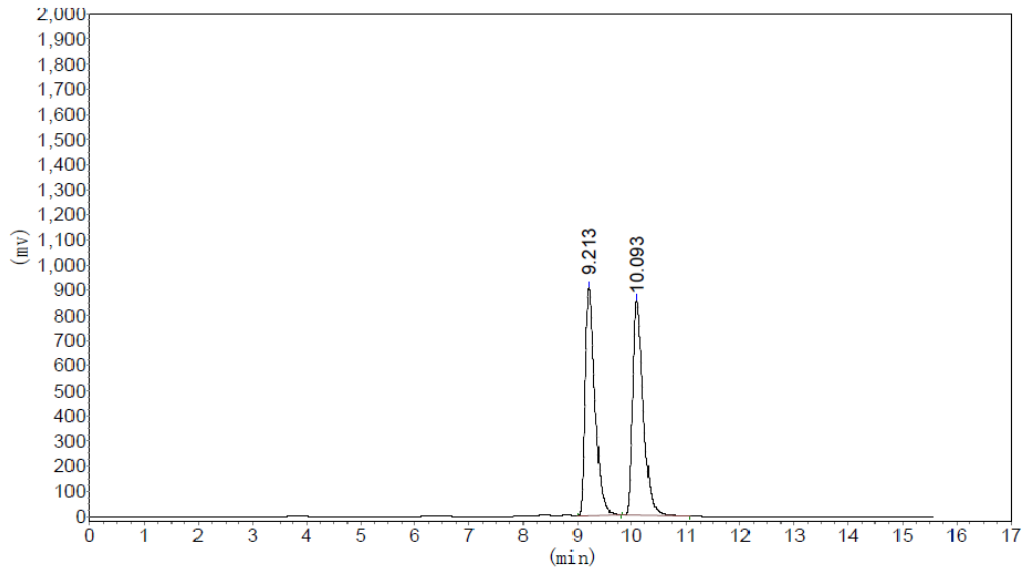

| Peak No.     | R. Time | Peak Height | Peak Area    | Percent  |
|--------------|---------|-------------|--------------|----------|
| 1            | 9.213   | 911170.625  | 11573544.000 | 49.6305  |
| 2            | 10.093  | 857304.063  | 11745871.000 | 50.3695  |
| <b>Total</b> |         | 1768474.688 | 23319415.000 | 100.0000 |

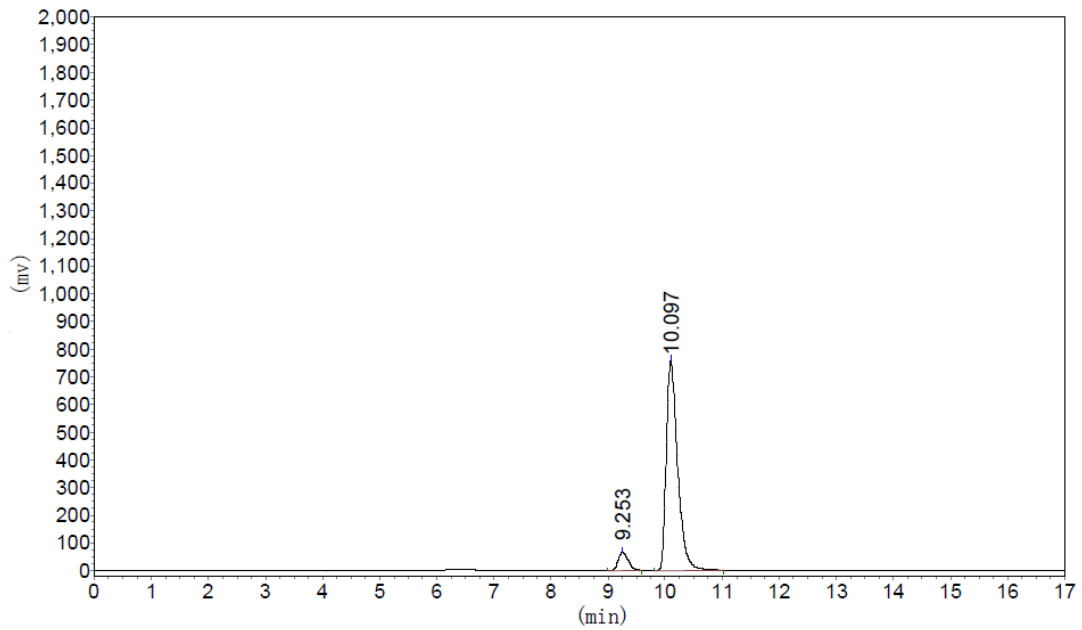

| Peak No.     | R. Time | Peak Height | Peak Area    | Percent  |
|--------------|---------|-------------|--------------|----------|
| 1            | 9.253   | 65357.195   | 819019.250   | 7.2738   |
| 2            | 10.097  | 758672.438  | 10440836.000 | 92.7262  |
| <b>Total</b> |         | 824029.633  | 11259855.250 | 100.0000 |

3b

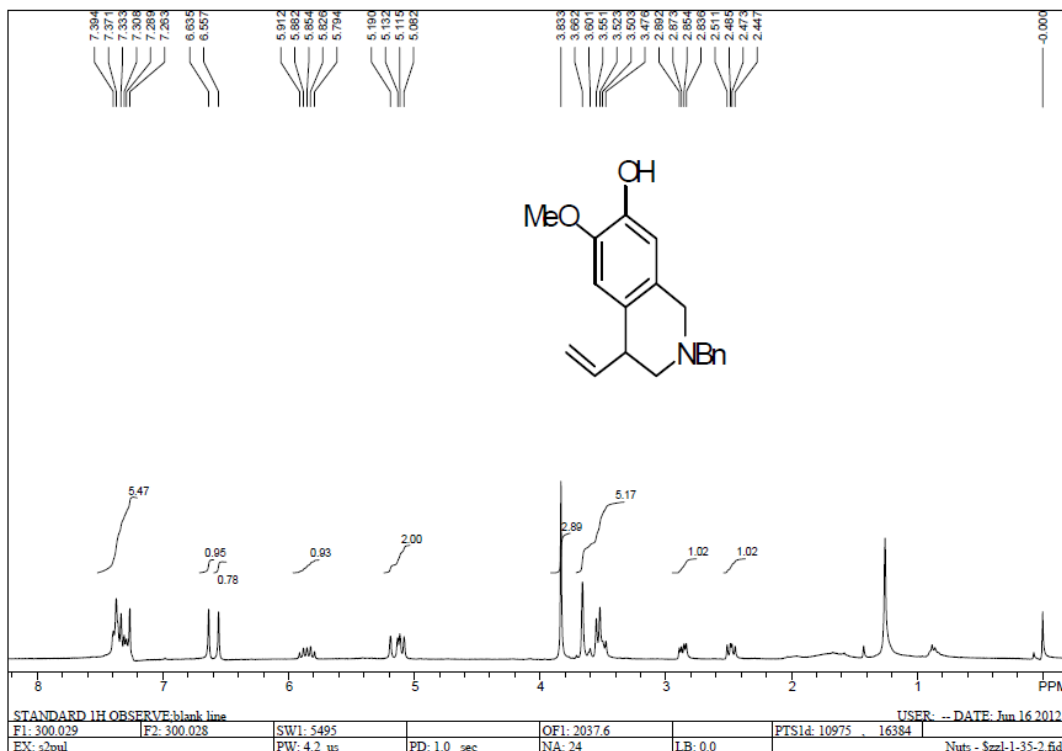

Auto-Scaled Chromatogram

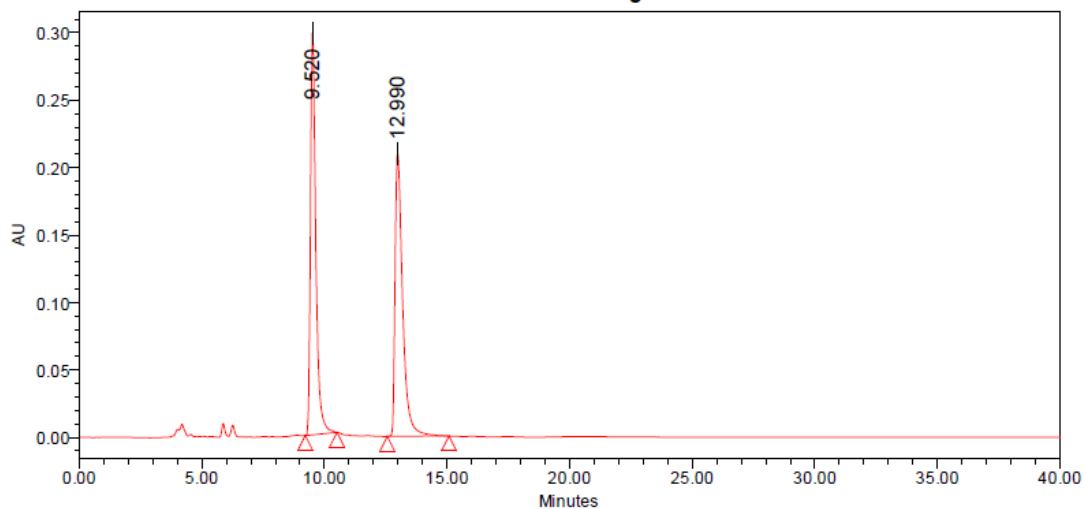

Peak Results

| Retention Time (min) | Area ( $\mu\text{V}^2\text{sec}$ ) | % Area |
|----------------------|------------------------------------|--------|
| 9.520                | 4524110                            | 50.11  |
| 12.990               | 4505040                            | 49.89  |

Auto-Scaled Chromatogram

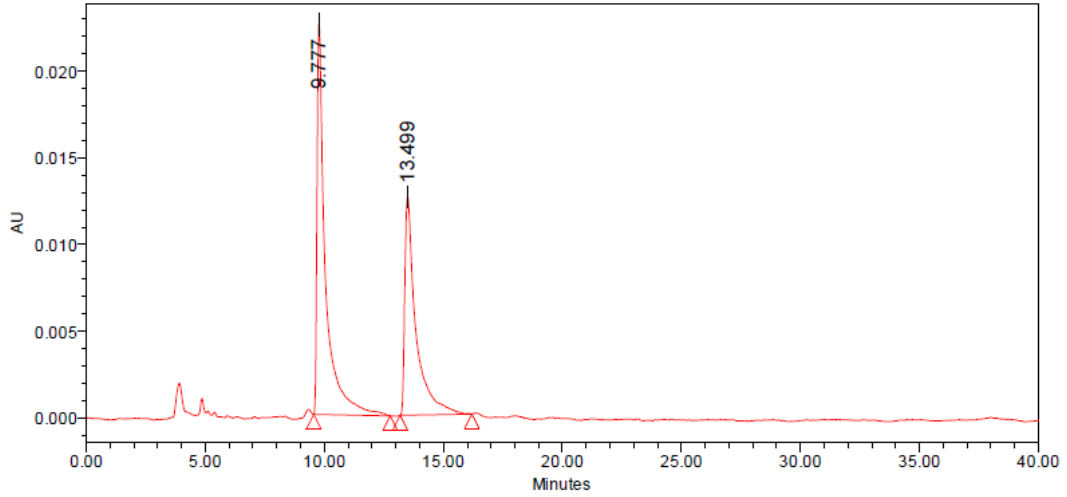

Peak Results

| Retention Time (min) | Area (μV*sec) | % Area |       |
|----------------------|---------------|--------|-------|
| 1                    | 9.777         | 556125 | 57.63 |
| 2                    | 13.499        | 408831 | 42.37 |

2c

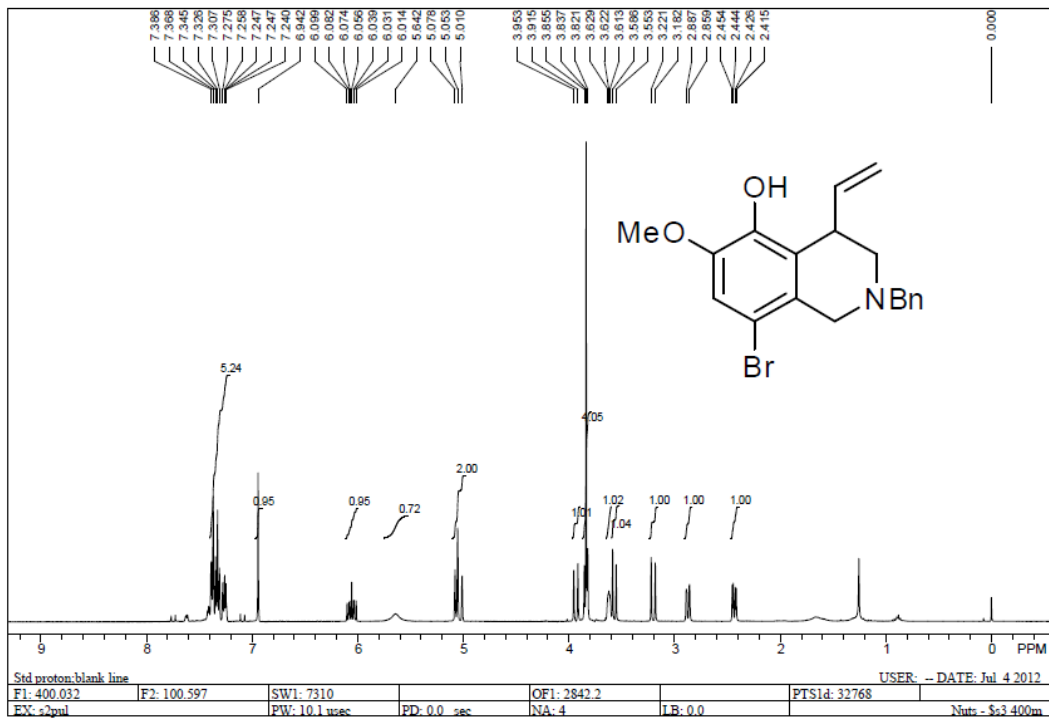

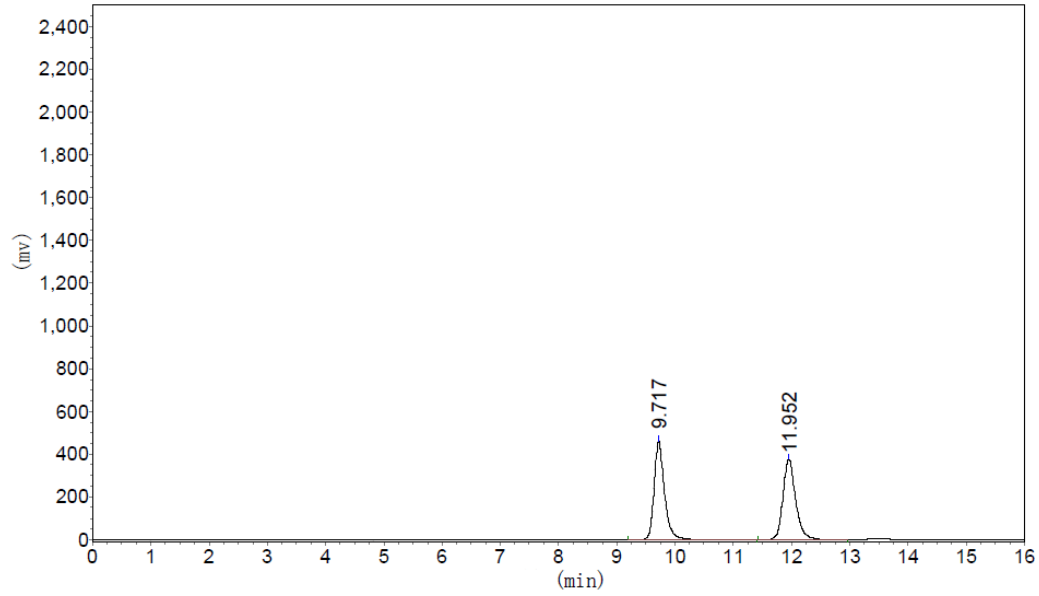

| Peak No.     | R. Time | Peak Height | Peak Area    | Percent  |
|--------------|---------|-------------|--------------|----------|
| 1            | 9.717   | 462778.875  | 5720537.000  | 50.3435  |
| 2            | 11.952  | 376938.219  | 5642463.500  | 49.6565  |
| <b>Total</b> |         | 839717.094  | 11363000.500 | 100.0000 |

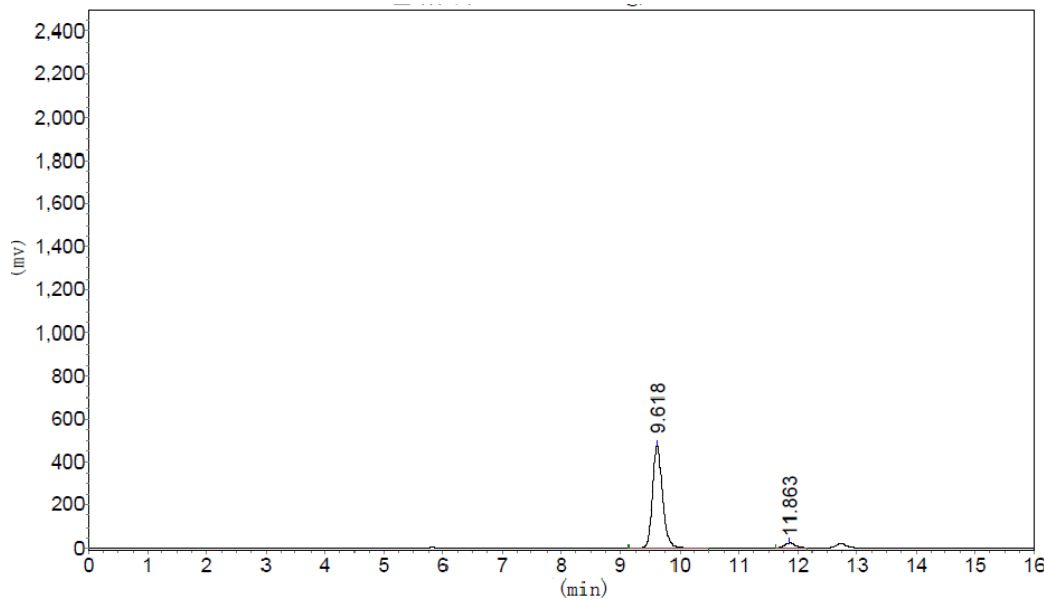

| Peak No.     | R. Time | Peak Height | Peak Area   | Percent  |
|--------------|---------|-------------|-------------|----------|
| 1            | 9.618   | 475712.188  | 5719961.000 | 94.8290  |
| 2            | 11.863  | 22777.473   | 311905.875  | 5.1710   |
| <b>Total</b> |         | 498489.660  | 6031866.875 | 100.0000 |

2d

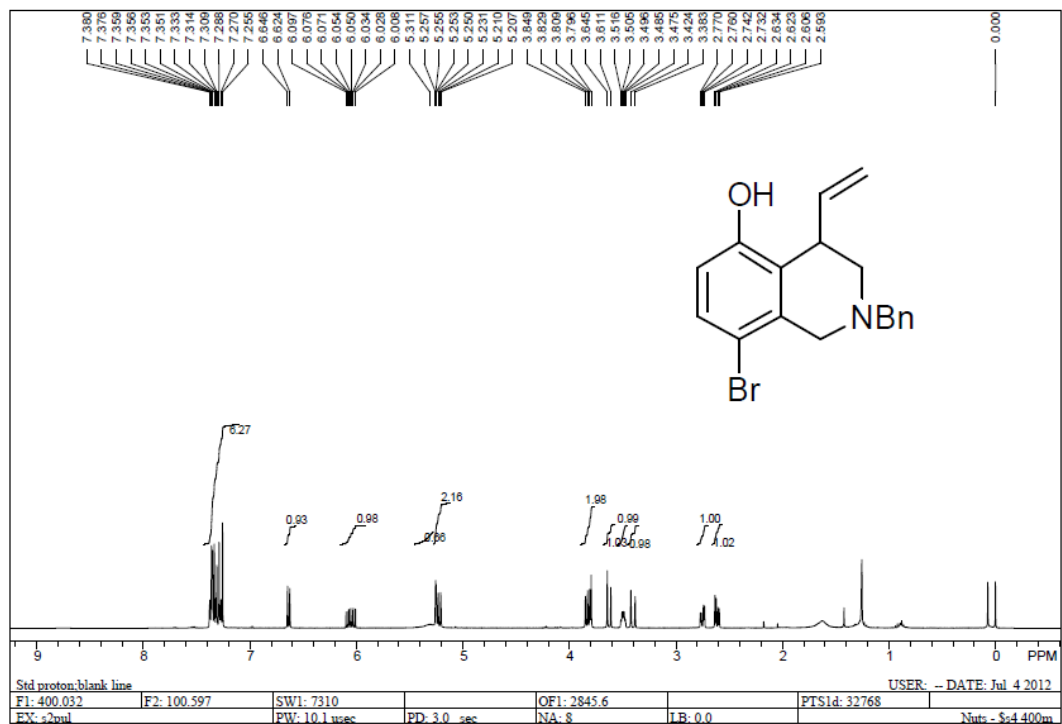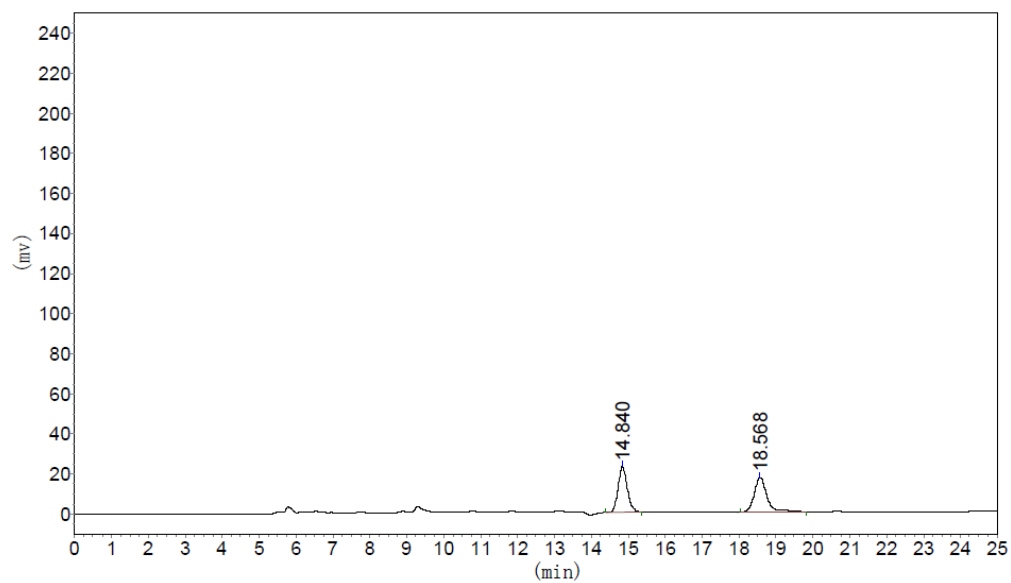

| Peak No.     | R. Time | Peak Height | Peak Area  | Percent  |
|--------------|---------|-------------|------------|----------|
| 1            | 14.840  | 22891.139   | 395427.813 | 49.2940  |
| 2            | 18.568  | 17213.246   | 406754.781 | 50.7060  |
| <b>Total</b> |         | 40104.385   | 802182.594 | 100.0000 |

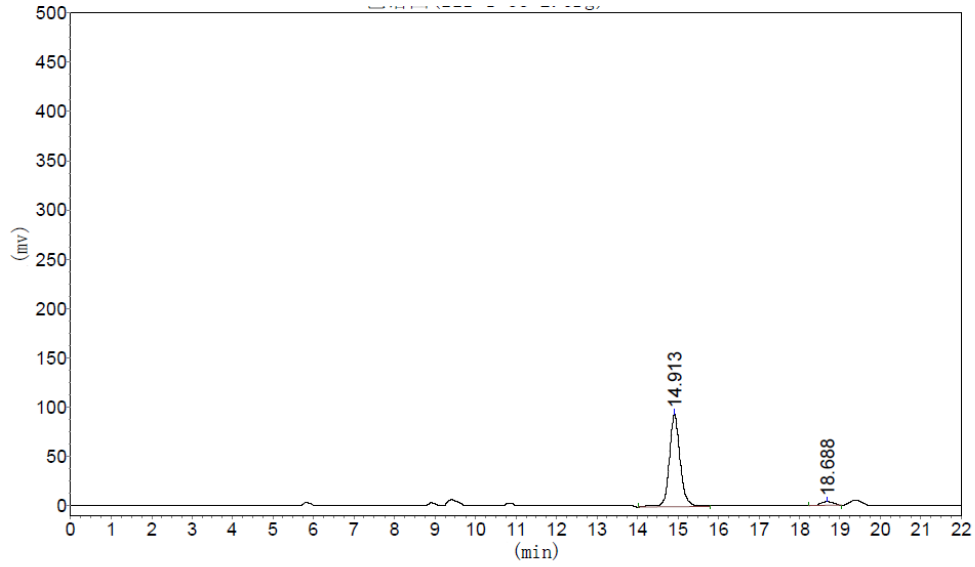

| Peak No.     | R. Time | Peak Height | Peak Area   | Percent  |
|--------------|---------|-------------|-------------|----------|
| 1            | 14.913  | 93991.555   | 1724479.375 | 95.6549  |
| 2            | 18.688  | 3947.226    | 78333.203   | 4.3451   |
| <b>Total</b> |         | 97938.781   | 1802812.578 | 100.0000 |

2e

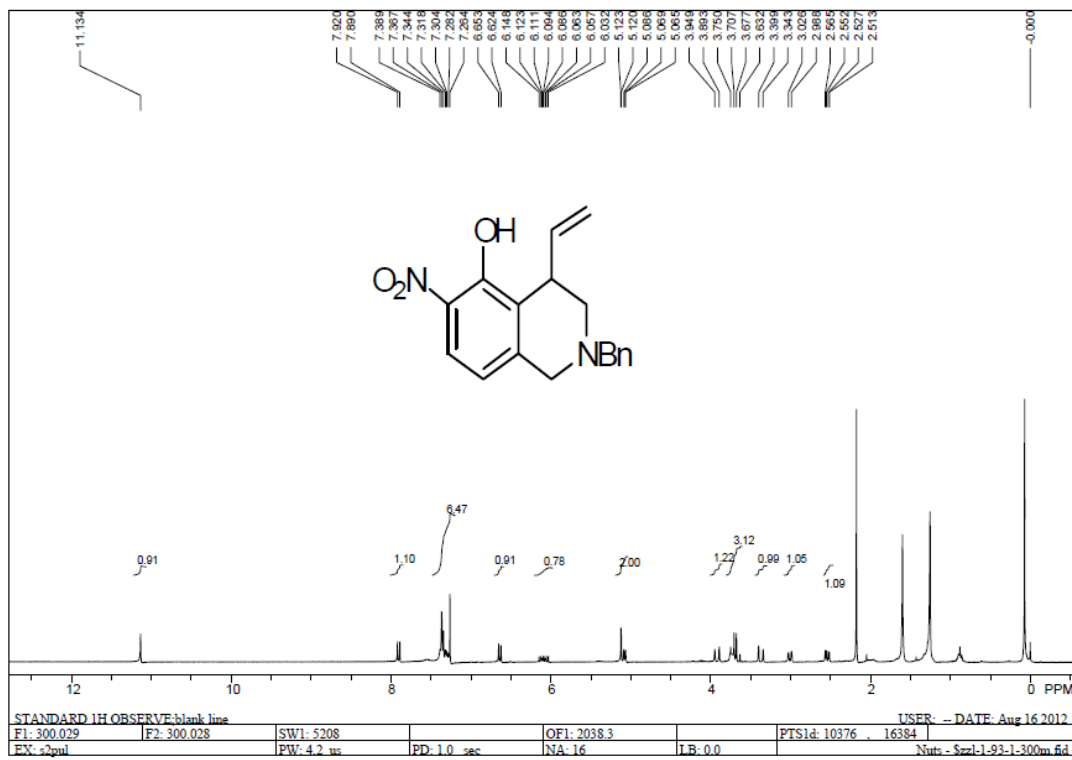



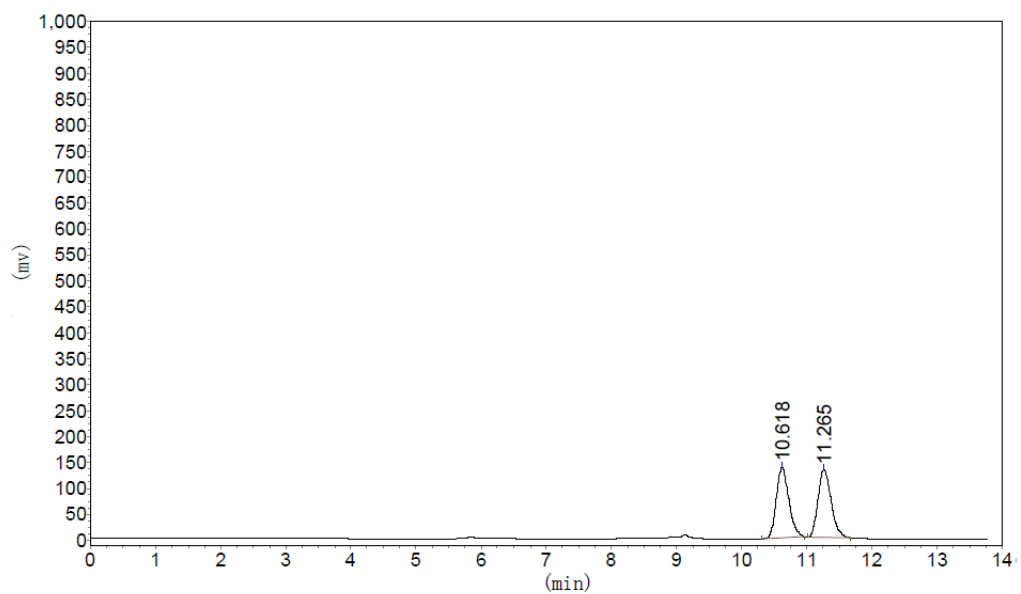

| Peak No.     | R. Time | Peak Height | Peak Area   | Percent  |
|--------------|---------|-------------|-------------|----------|
| 1            | 10.618  | 135844.109  | 1804174.125 | 49.9046  |
| 2            | 11.265  | 130447.852  | 1811074.000 | 50.0954  |
| <b>Total</b> |         | 266291.961  | 3615248.125 | 100.0000 |

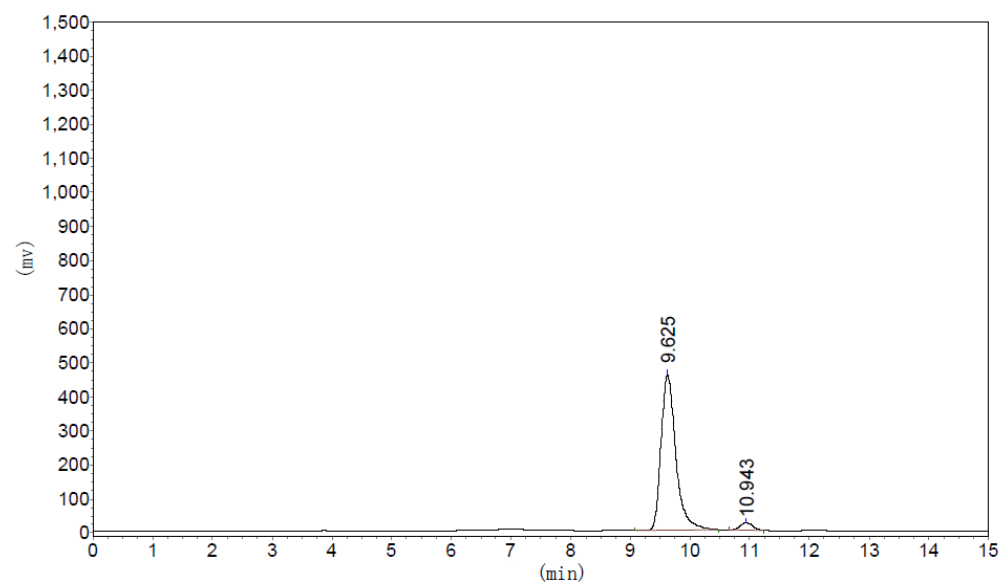

| Peak No.     | R. Time | Peak Height | Peak Area   | Percent  |
|--------------|---------|-------------|-------------|----------|
| 1            | 9.625   | 456211.594  | 7916918.500 | 96.1708  |
| 2            | 10.943  | 20820.307   | 315224.063  | 3.8292   |
| <b>Total</b> |         | 477031.900  | 8232142.563 | 100.0000 |

2f

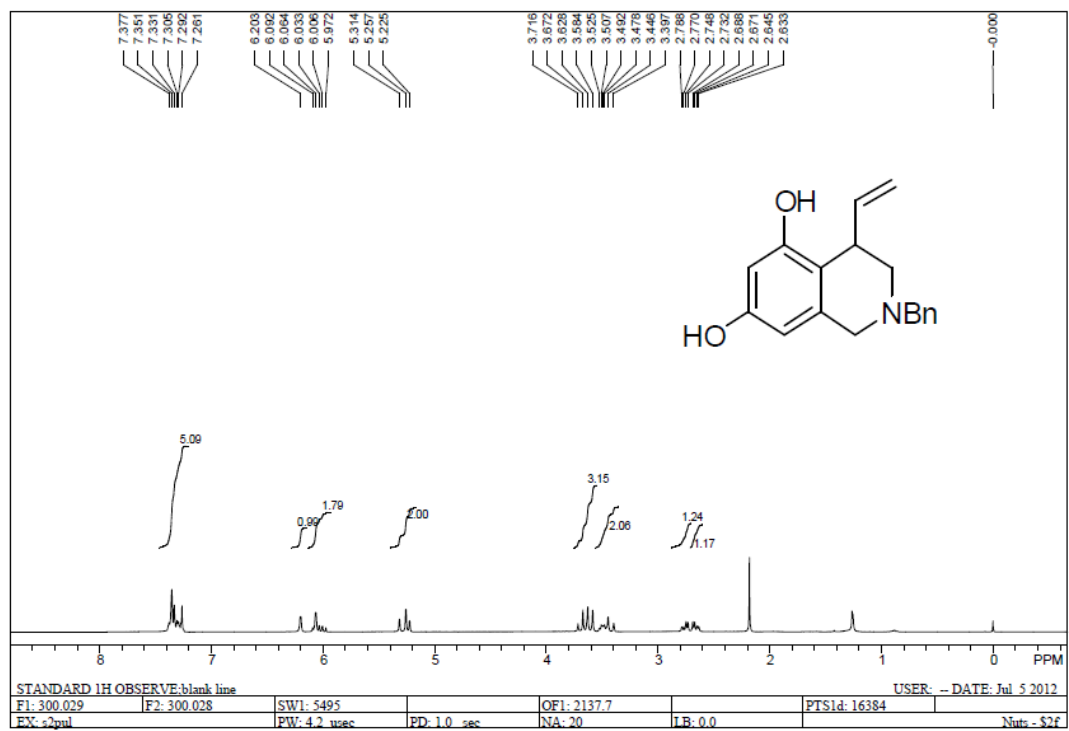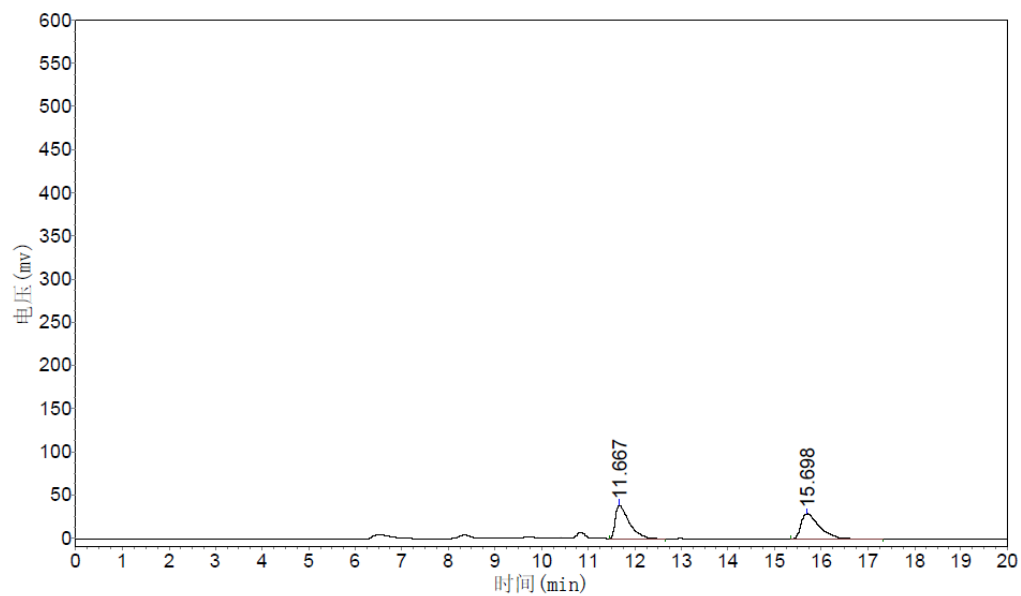

| Peak No.     | R. Time | Peak Height | Peak Area   | Percent  |
|--------------|---------|-------------|-------------|----------|
| 1            | 11.667  | 39163.109   | 811369.125  | 50.2230  |
| 2            | 15.698  | 29372.490   | 804162.688  | 49.7770  |
| <b>Total</b> |         | 68535.600   | 1615531.813 | 100.0000 |

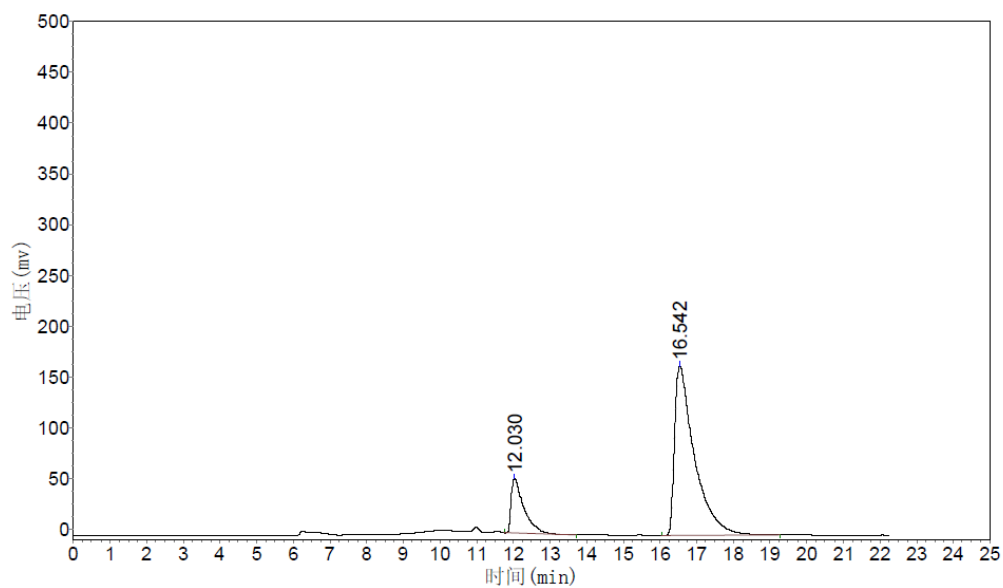

| Peak No.     | R. Time | Peak Height | Peak Area   | Percent  |
|--------------|---------|-------------|-------------|----------|
| 1            | 12.030  | 53682.711   | 1291634.250 | 17.0831  |
| 2            | 16.542  | 166665.719  | 6269235.500 | 82.9169  |
| <b>Total</b> |         | 220348.430  | 7560869.750 | 100.0000 |

2g

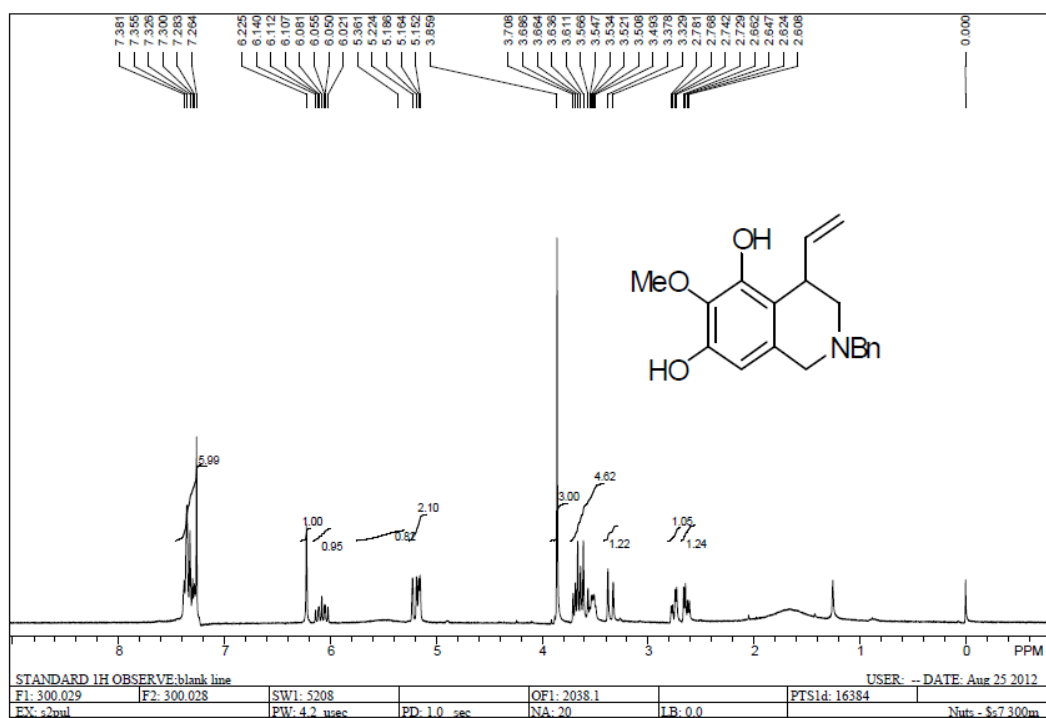

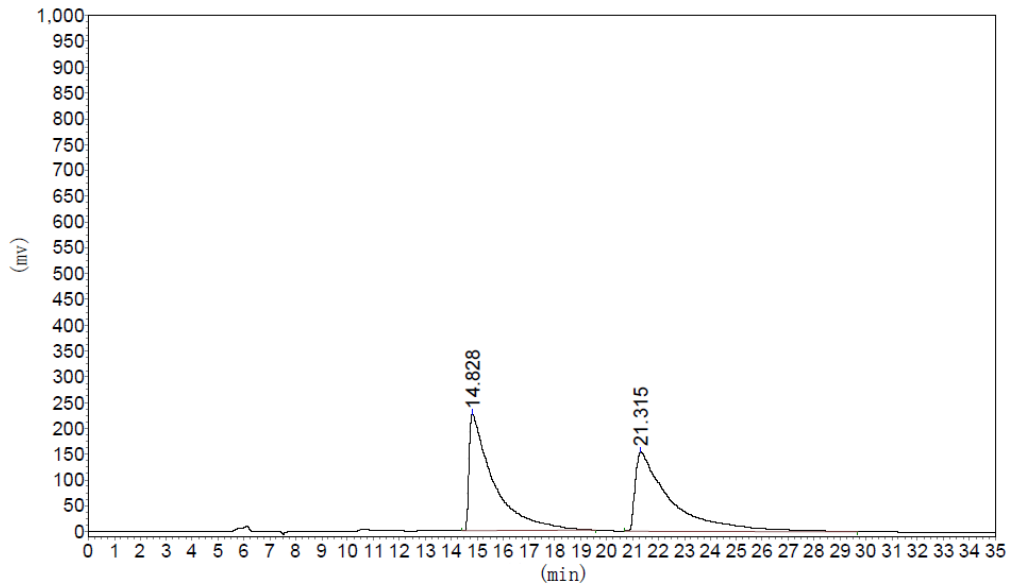

| Peak No.     | R. Time | Peak Height | Peak Area    | Percent  |
|--------------|---------|-------------|--------------|----------|
| 1            | 14.828  | 225774.078  | 14778660.000 | 50.6736  |
| 2            | 21.315  | 152538.938  | 14385764.000 | 49.3264  |
| <b>Total</b> |         | 378313.016  | 29164424.000 | 100.0000 |

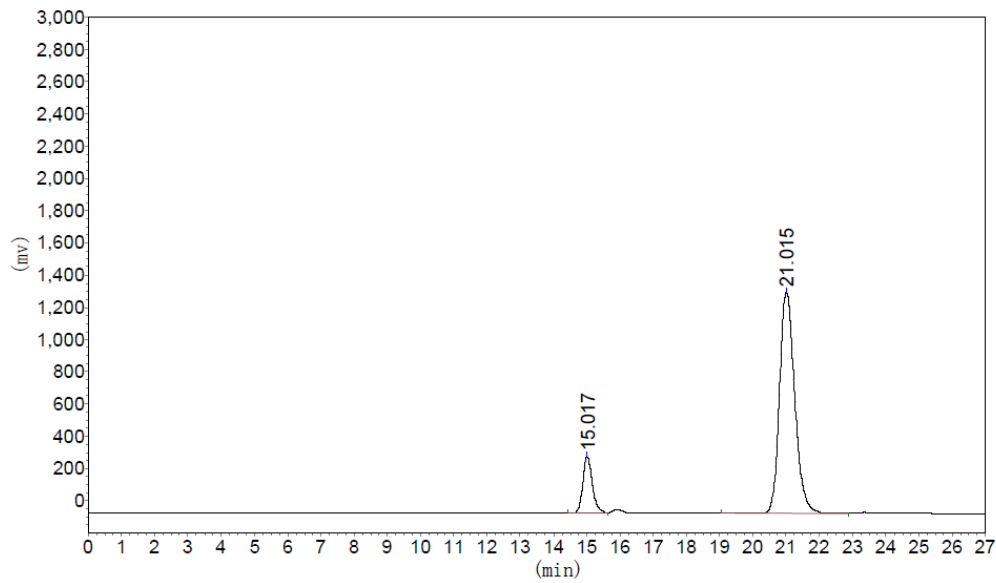

| Peak No.     | R. Time | Peak Height | Peak Area    | Percent  |
|--------------|---------|-------------|--------------|----------|
| 1            | 15.017  | 350631.406  | 7072797.000  | 13.8754  |
| 2            | 21.015  | 1371830.875 | 43900764.000 | 86.1246  |
| <b>Total</b> |         | 1722462.281 | 50973561.000 | 100.0000 |

3h

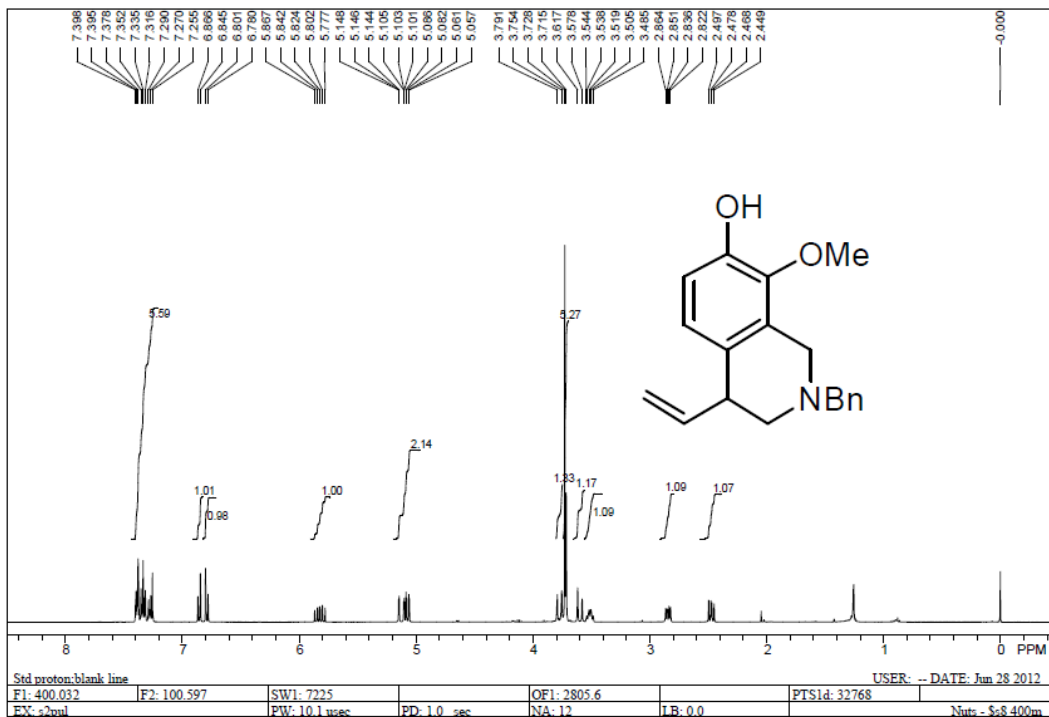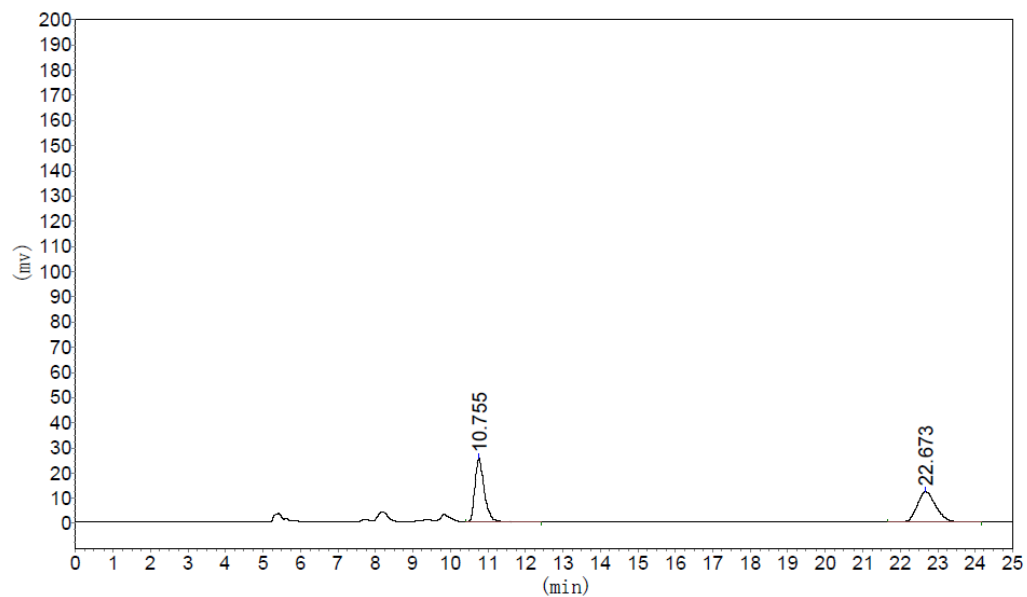

| Peak No.     | R. Time | Peak Height | Peak Area  | Percent  |
|--------------|---------|-------------|------------|----------|
| 1            | 10.755  | 25401.350   | 444447.875 | 50.9432  |
| 2            | 22.673  | 12112.518   | 427990.094 | 49.0568  |
| <b>Total</b> |         | 37513.867   | 872437.969 | 100.0000 |

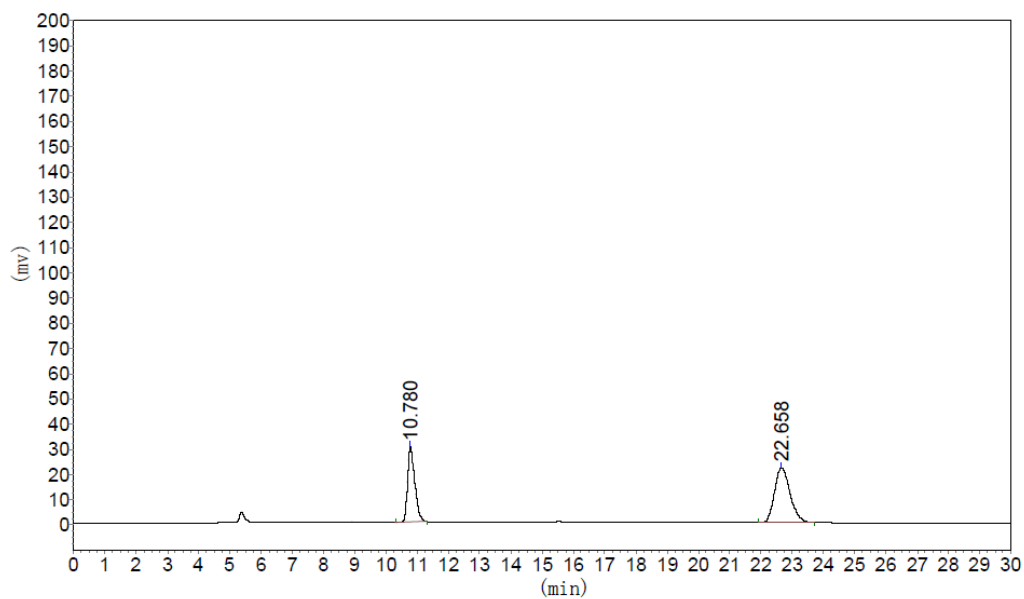

| Peak No.     | R. Time | Peak Height | Peak Area   | Percent  |
|--------------|---------|-------------|-------------|----------|
| 1            | 10.780  | 30051.648   | 483567.219  | 39.2321  |
| 2            | 22.658  | 21757.299   | 749013.188  | 60.7679  |
| <b>Total</b> |         | 51808.947   | 1232580.406 | 100.0000 |

3i

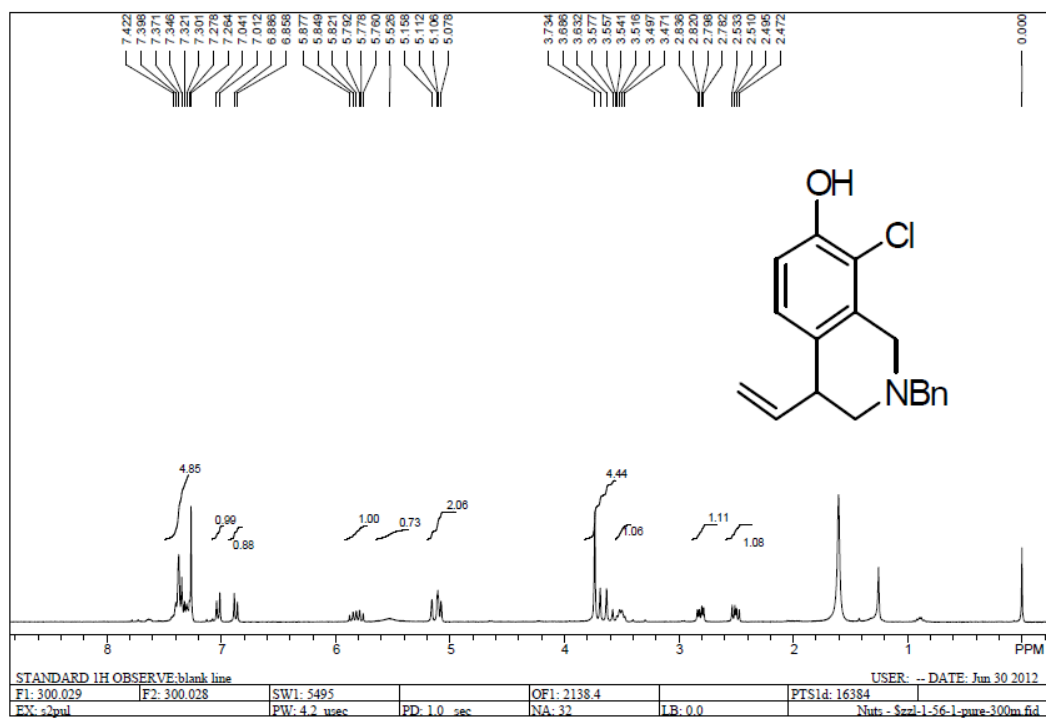

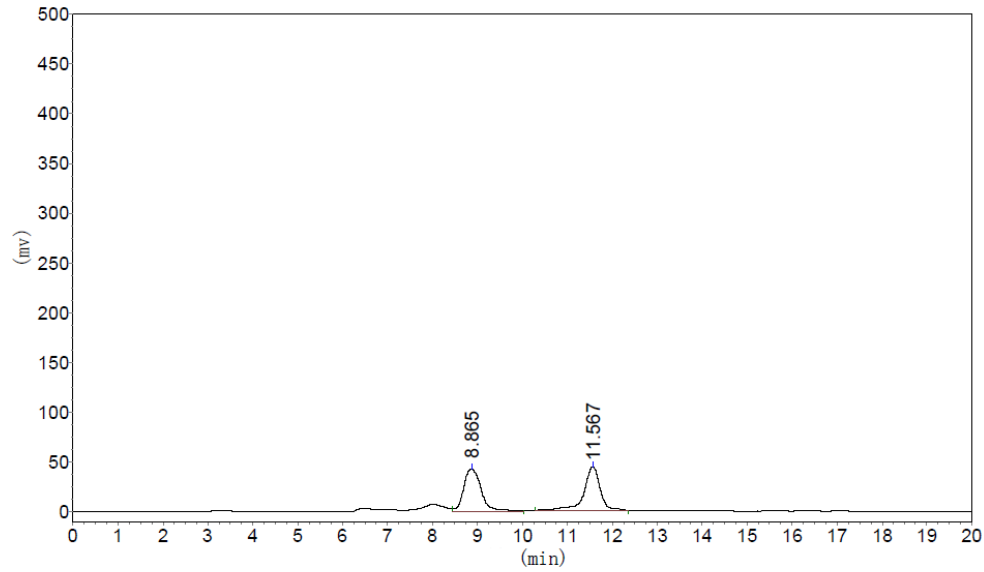

| Peak No.     | R. Time | Peak Height | Peak Area   | Percent  |
|--------------|---------|-------------|-------------|----------|
| 1            | 8.865   | 42290.895   | 1126388.000 | 50.0740  |
| 2            | 11.567  | 44074.895   | 1123060.625 | 49.9260  |
| <b>Total</b> |         | 86365.789   | 2249448.625 | 100.0000 |

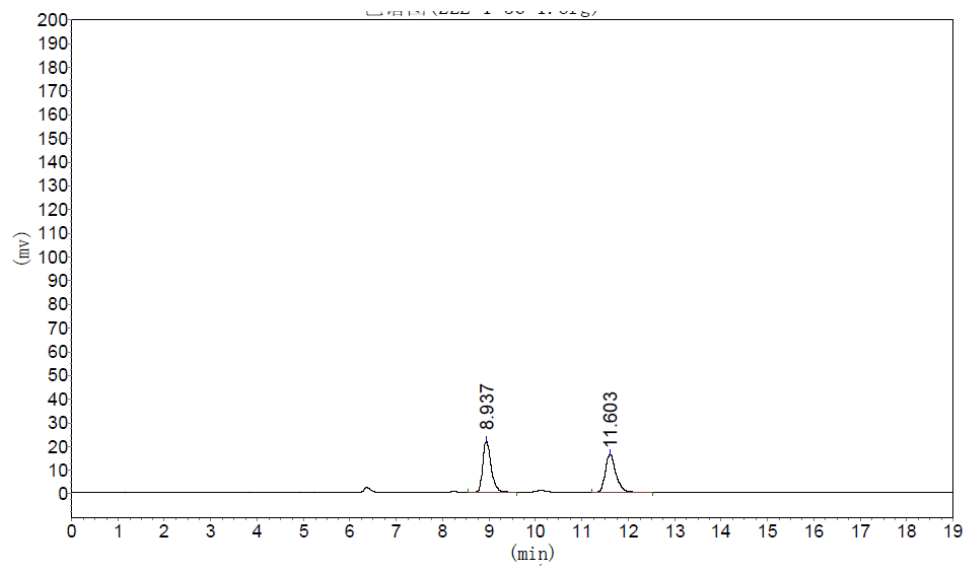

| Peak No.     | R. Time | Peak Height | Peak Area  | Percent  |
|--------------|---------|-------------|------------|----------|
| 1            | 8.937   | 21595.457   | 269102.281 | 51.6510  |
| 2            | 11.603  | 16003.080   | 251898.359 | 48.3490  |
| <b>Total</b> |         | 37598.537   | 521000.641 | 100.0000 |

2j

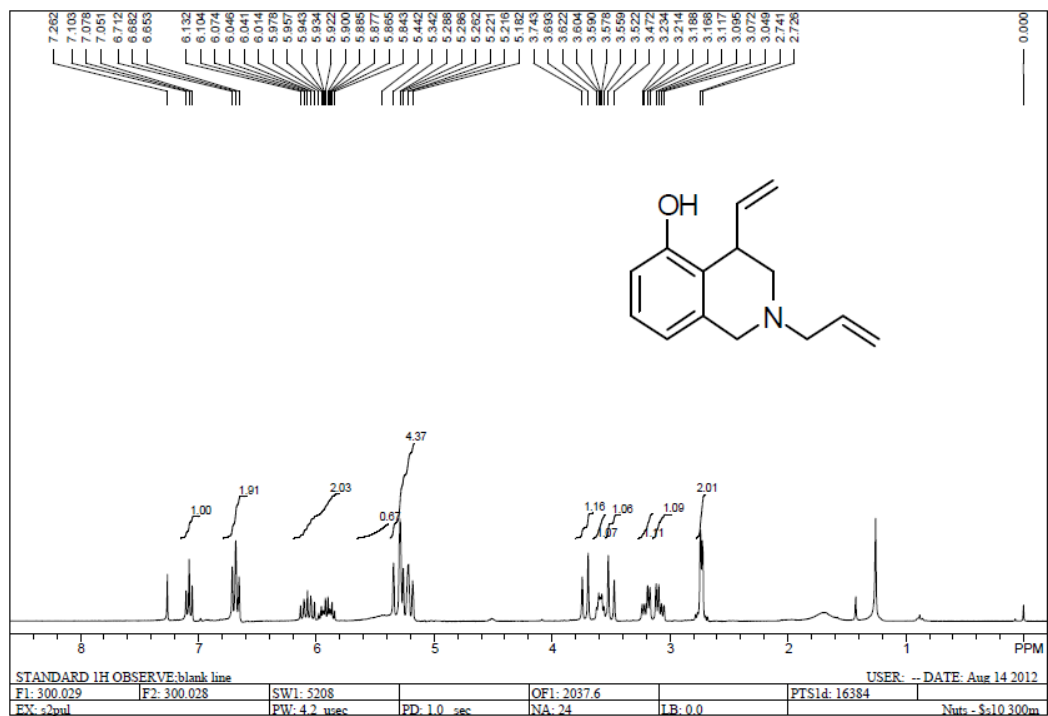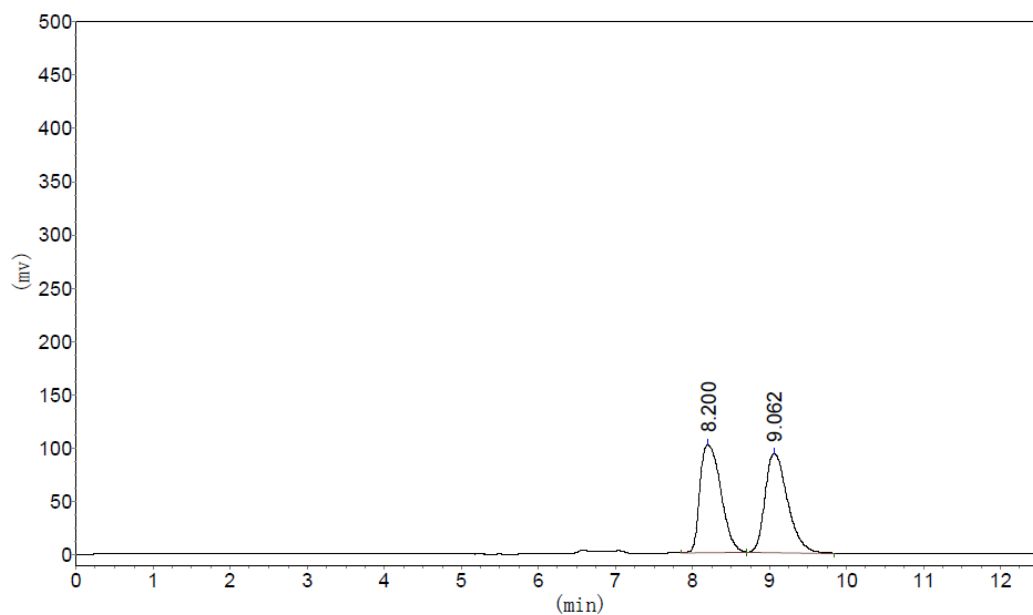

| Peak No.     | R. Time | Peak Height | Peak Area   | Percent  |
|--------------|---------|-------------|-------------|----------|
| 1            | 8.200   | 101251.406  | 1897255.625 | 50.1748  |
| 2            | 9.062   | 92674.672   | 1884033.625 | 49.8252  |
| <b>Total</b> |         | 193926.078  | 3781289.250 | 100.0000 |



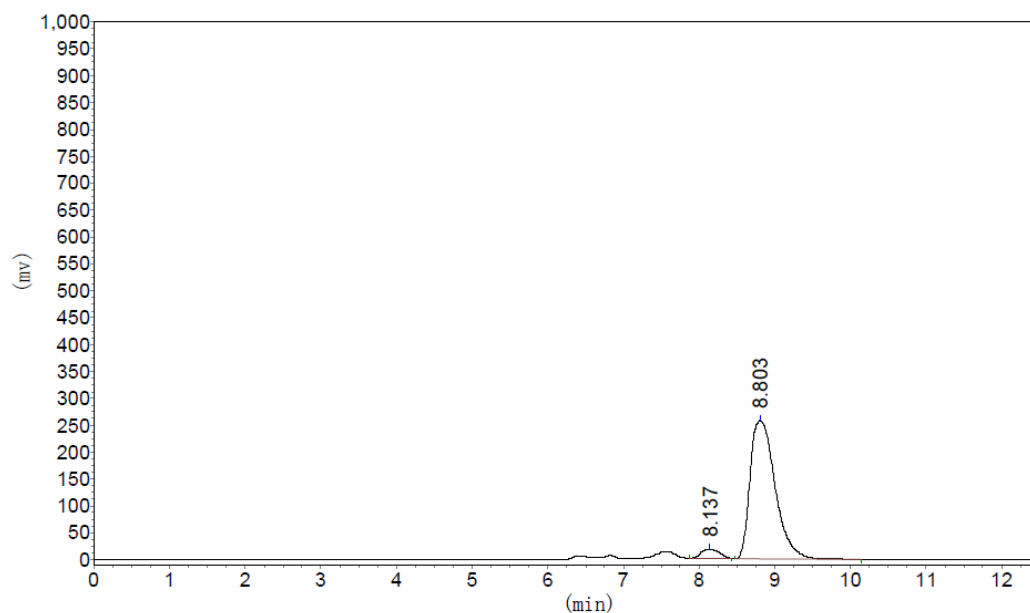

| Peak No.     | R. Time | Peak Height | Peak Area   | Percent  |
|--------------|---------|-------------|-------------|----------|
| 1            | 8.137   | 16194.304   | 277860.406  | 4.4988   |
| 2            | 8.803   | 256949.531  | 5898503.000 | 95.5012  |
| <b>Total</b> |         | 273143.835  | 6176363.406 | 100.0000 |

2k

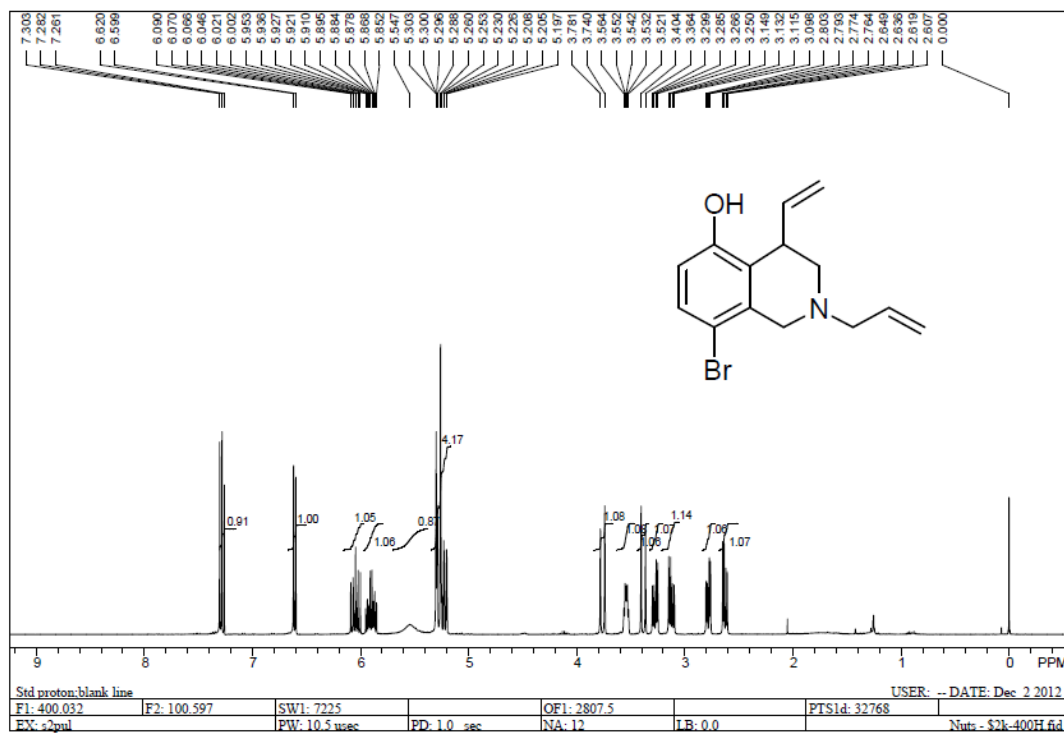

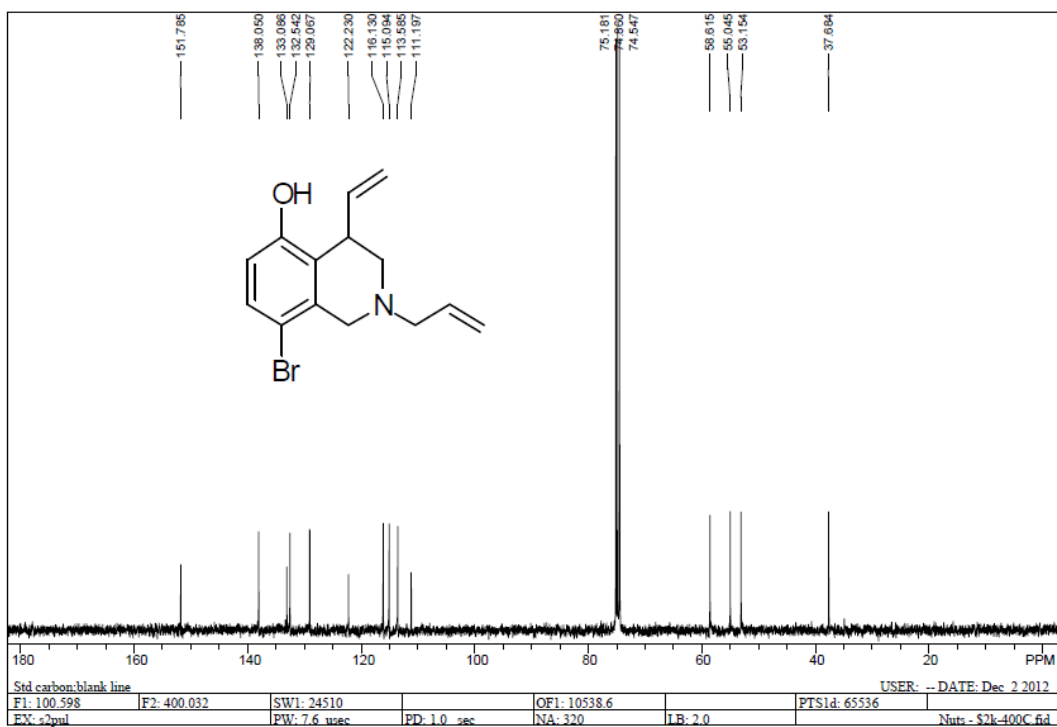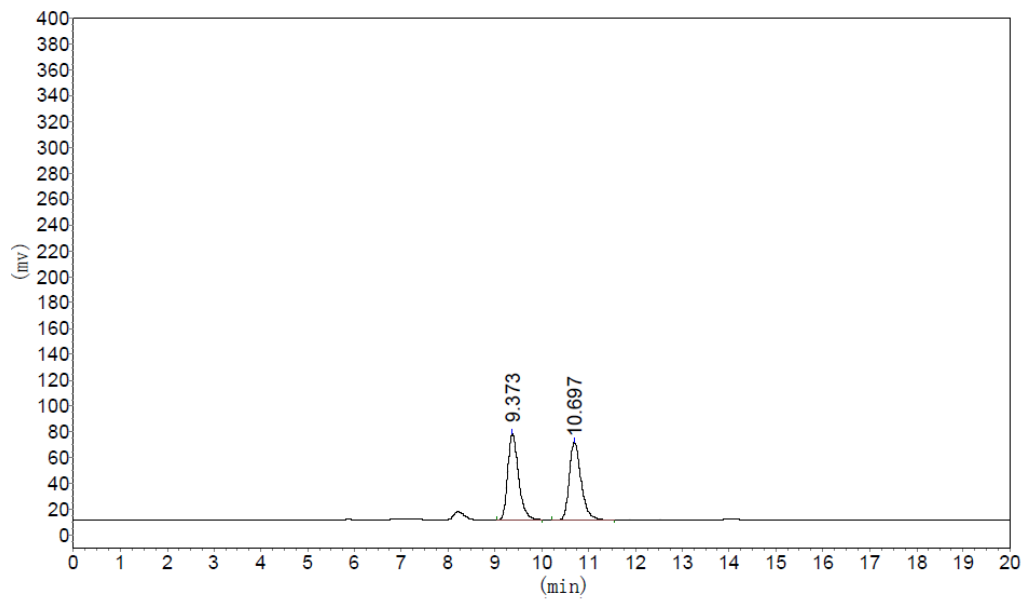

| Peak No.     | R. Time | Peak Height | Peak Area   | Percent  |
|--------------|---------|-------------|-------------|----------|
| 1            | 9.373   | 66231.359   | 1055711.375 | 50.0400  |
| 2            | 10.697  | 59720.484   | 1054022.750 | 49.9600  |
| <b>Total</b> |         | 125951.844  | 2109734.125 | 100.0000 |

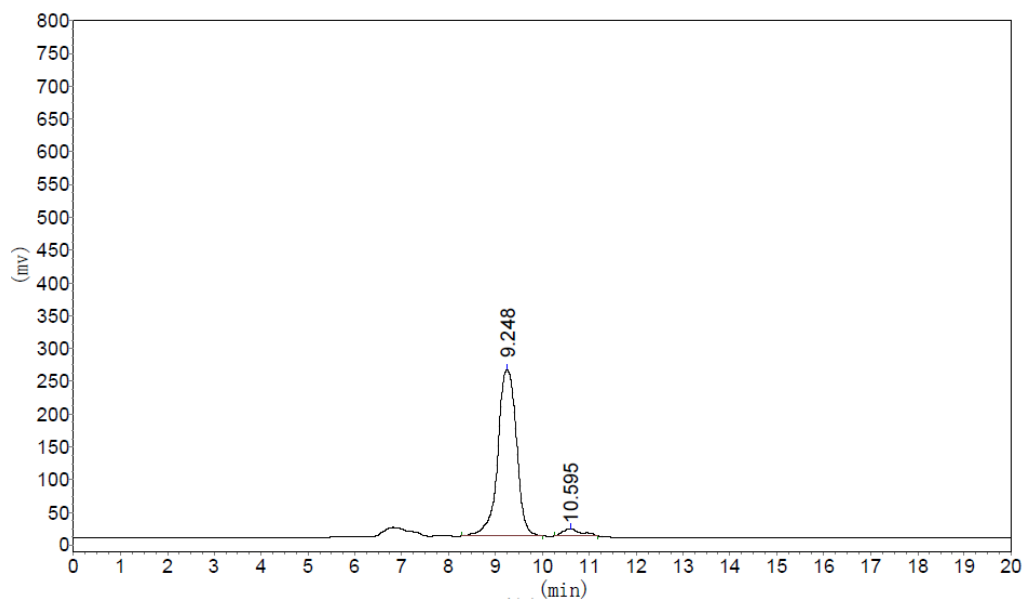

| Peak No.     | R. Time | Peak Height | Peak Area   | Percent  |
|--------------|---------|-------------|-------------|----------|
| 1            | 9.248   | 253410.250  | 6957067.500 | 96.1478  |
| 2            | 10.595  | 10199.615   | 278739.594  | 3.8522   |
| <b>Total</b> |         | 263609.865  | 7235807.094 | 100.0000 |

21

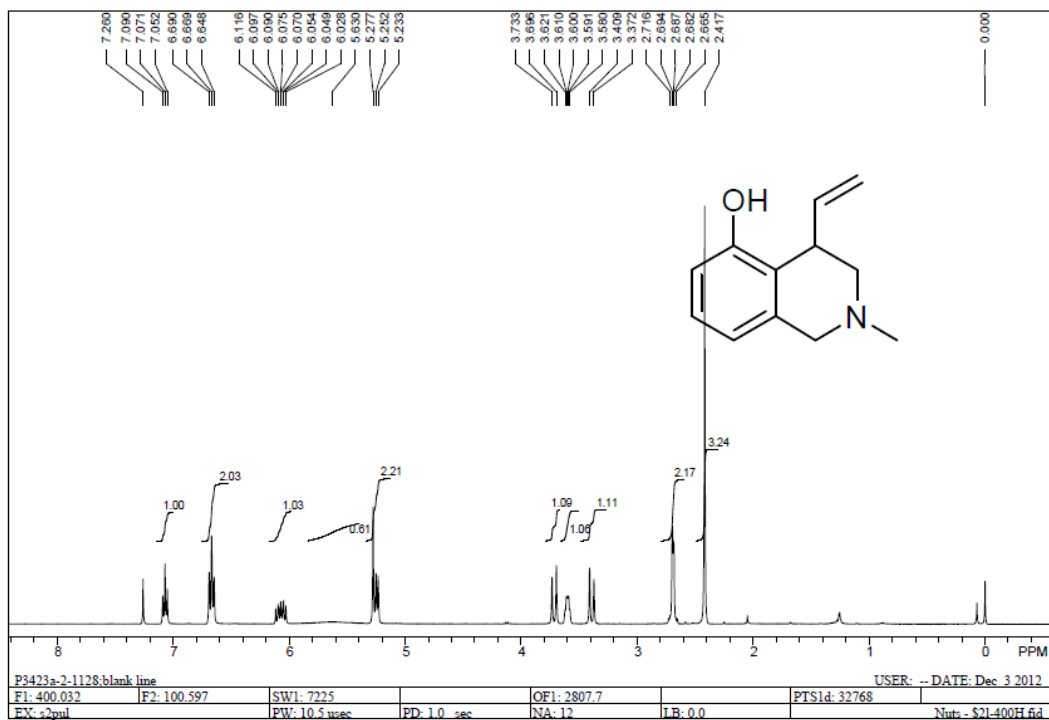

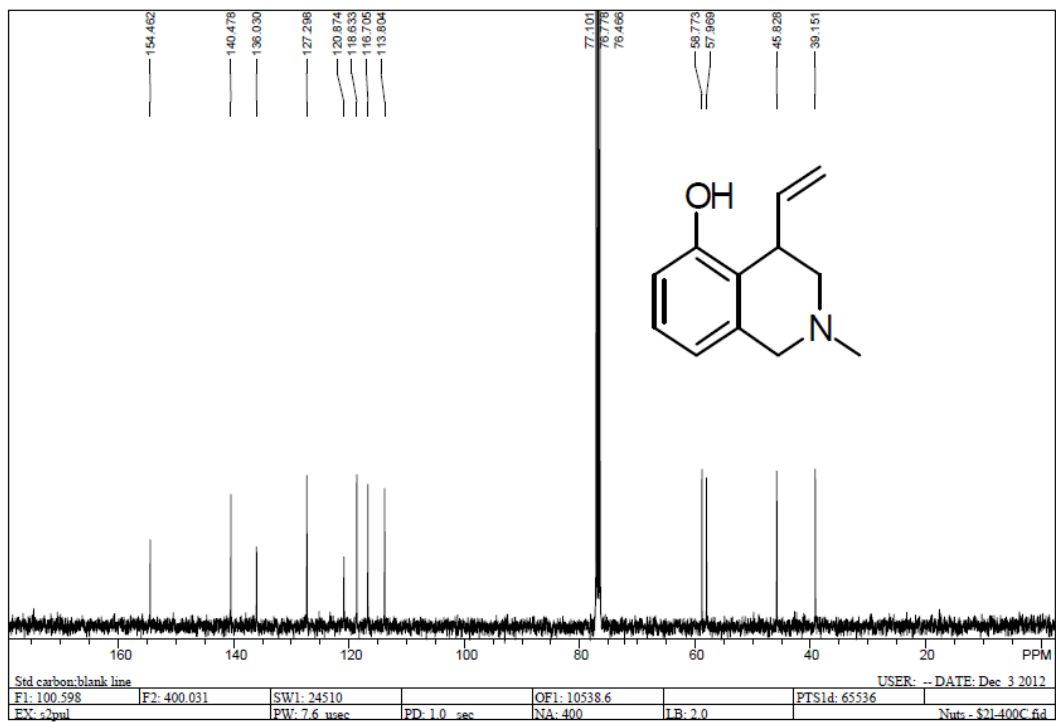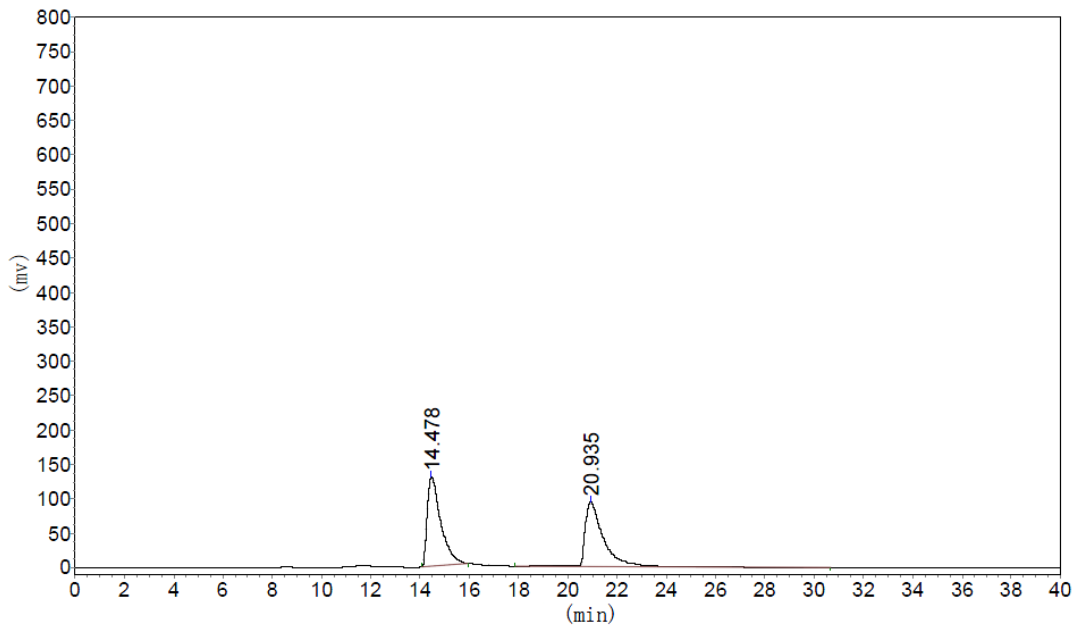

| Peak No.     | R. Time | Peak Height | Peak Area   | Percent  |
|--------------|---------|-------------|-------------|----------|
| 1            | 14.478  | 129253.047  | 4962077.500 | 50.8697  |
| 2            | 20.935  | 93473.320   | 4792417.000 | 49.1303  |
| <b>Total</b> |         | 222726.367  | 9754494.500 | 100.0000 |

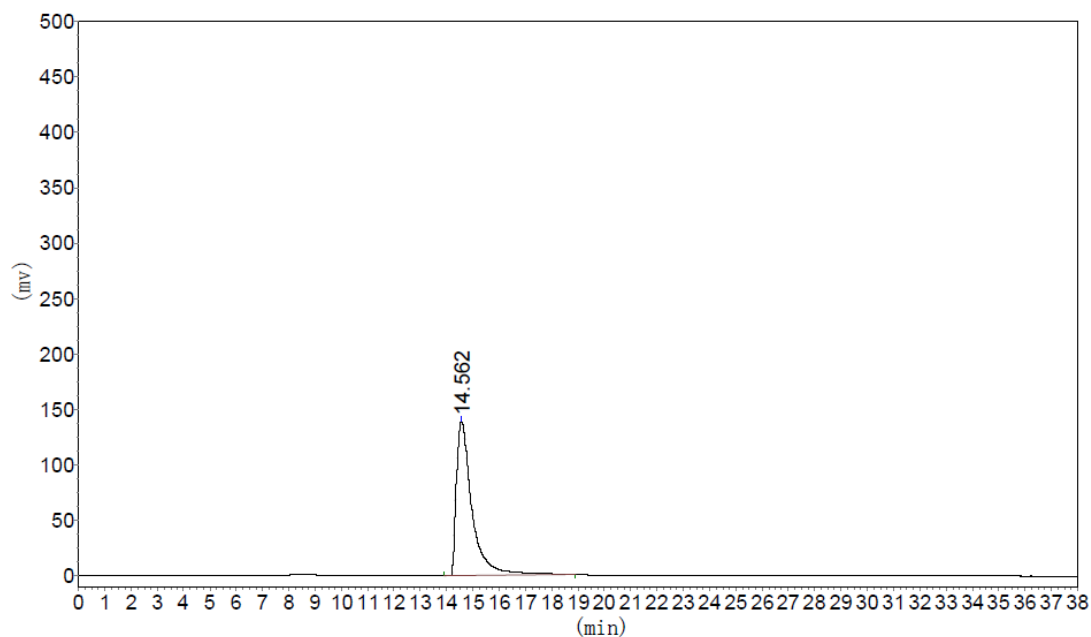

| Peak No.     | R. Time | Peak Height | Peak Area   | Percent  |
|--------------|---------|-------------|-------------|----------|
| 1            | 14.562  | 139288.547  | 5790752.000 | 100.0000 |
| <b>Total</b> |         | 139288.547  | 5790752.000 | 100.0000 |

2m

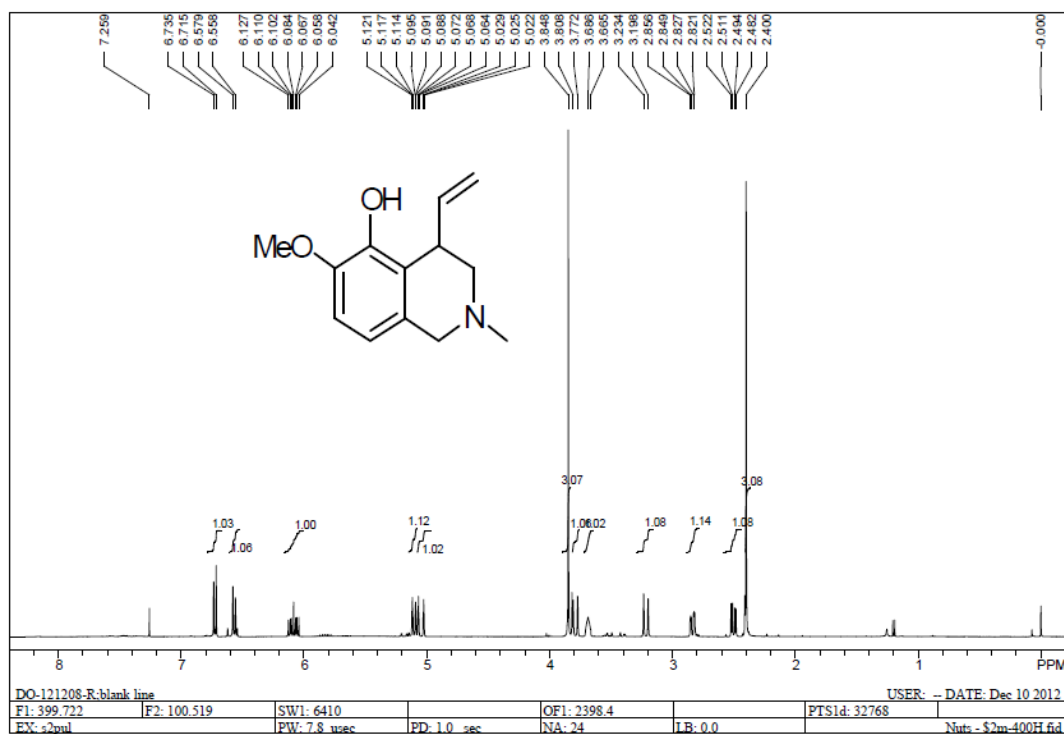

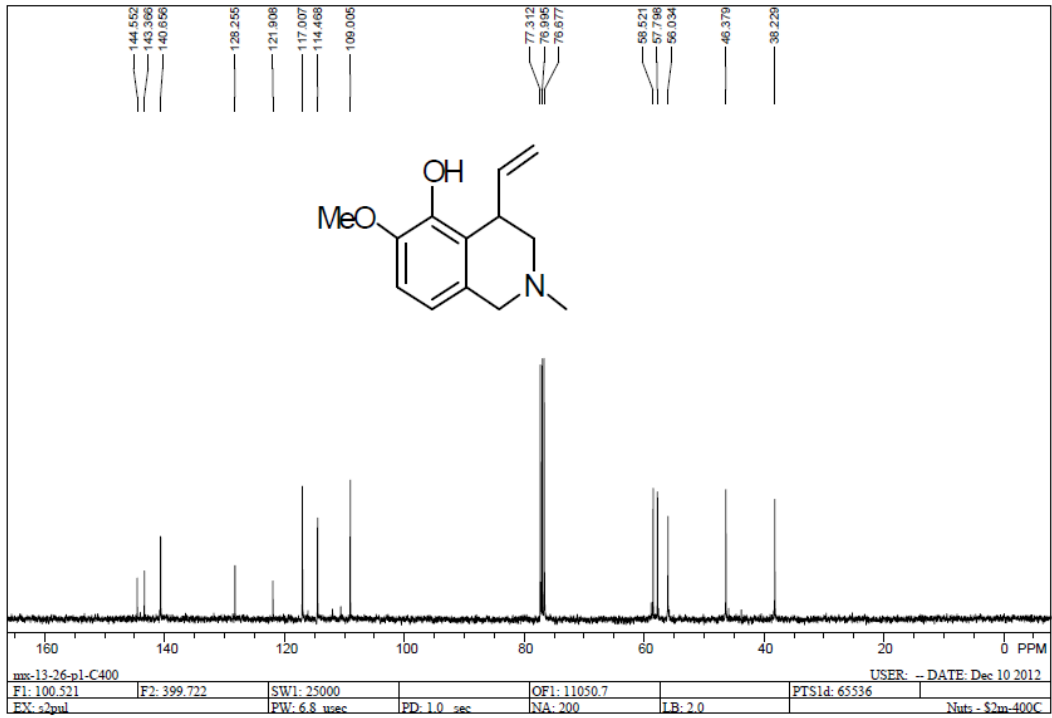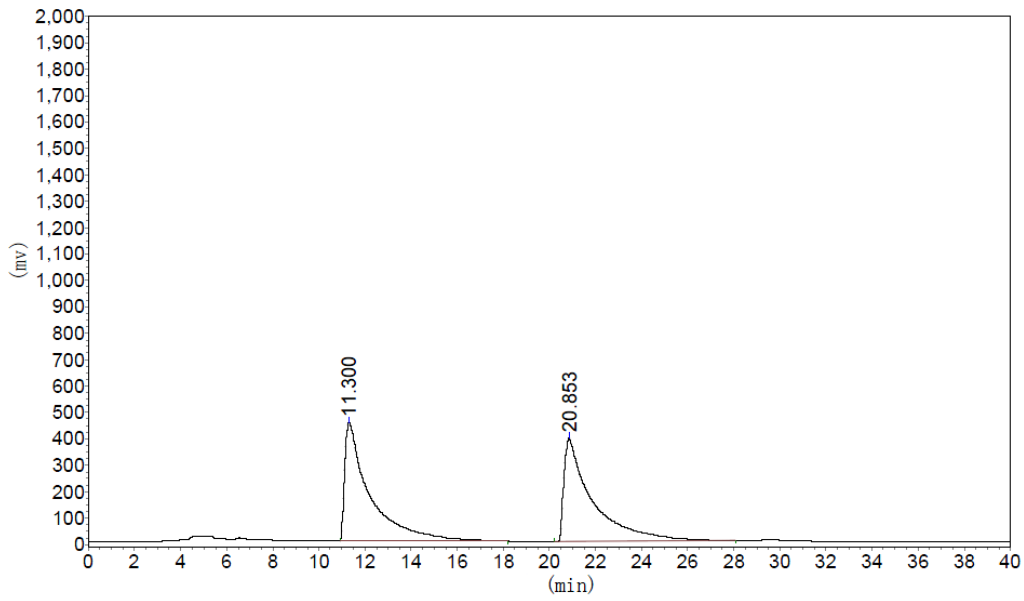

| Peak No.     | R. Time | Peak Height | Peak Area    | Percent  |
|--------------|---------|-------------|--------------|----------|
| 1            | 11.300  | 448902.844  | 33978716.000 | 50.3657  |
| 2            | 20.853  | 392255.313  | 33485298.000 | 49.6343  |
| <b>Total</b> |         | 841158.156  | 67464014.000 | 100.0000 |

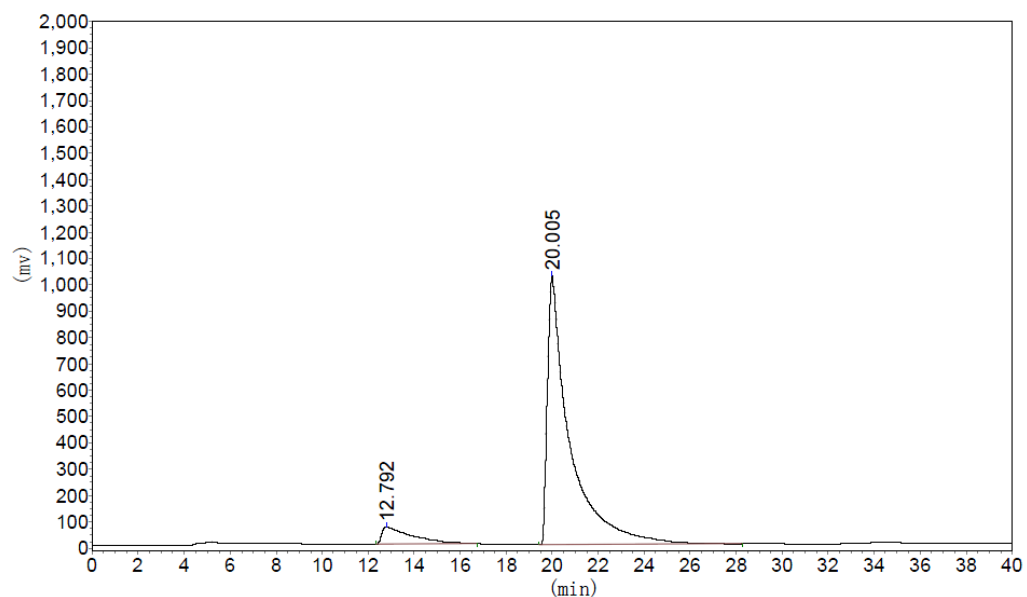

| Peak No.     | R. Time | Peak Height | Peak Area    | Percent  |
|--------------|---------|-------------|--------------|----------|
| 1            | 12.792  | 64345.637   | 5984864.000  | 8.0115   |
| 2            | 20.005  | 1019144.938 | 68718920.000 | 91.9885  |
| <b>Total</b> |         | 1083490.574 | 74703784.000 | 100.0000 |

2n

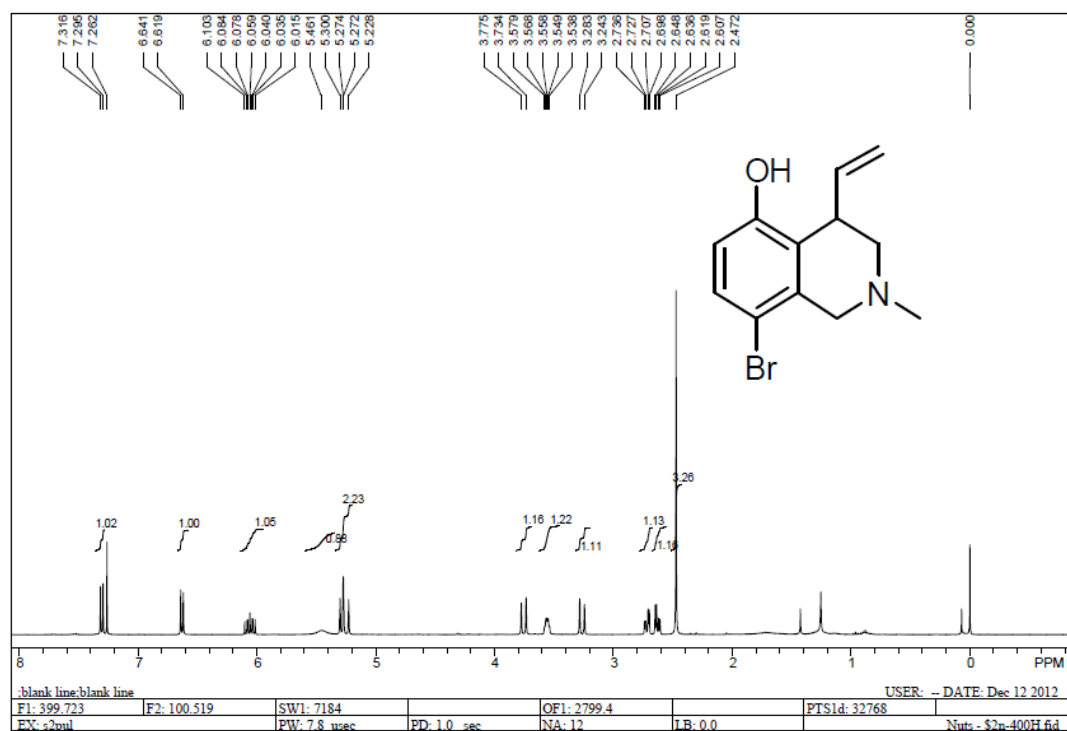

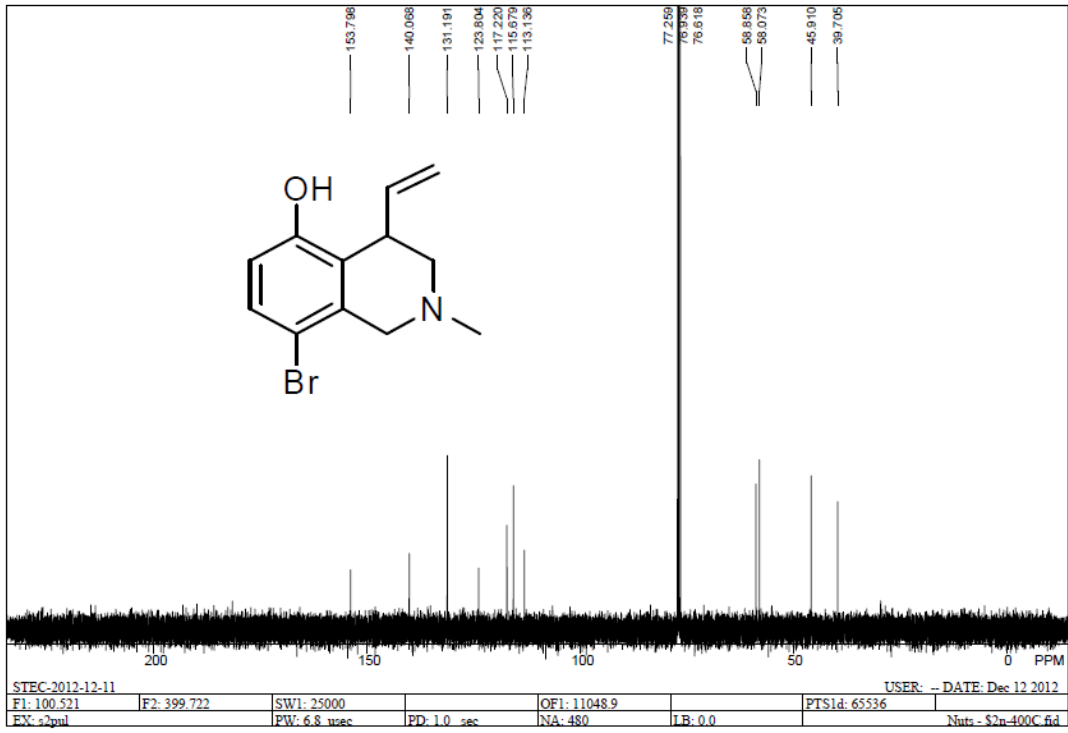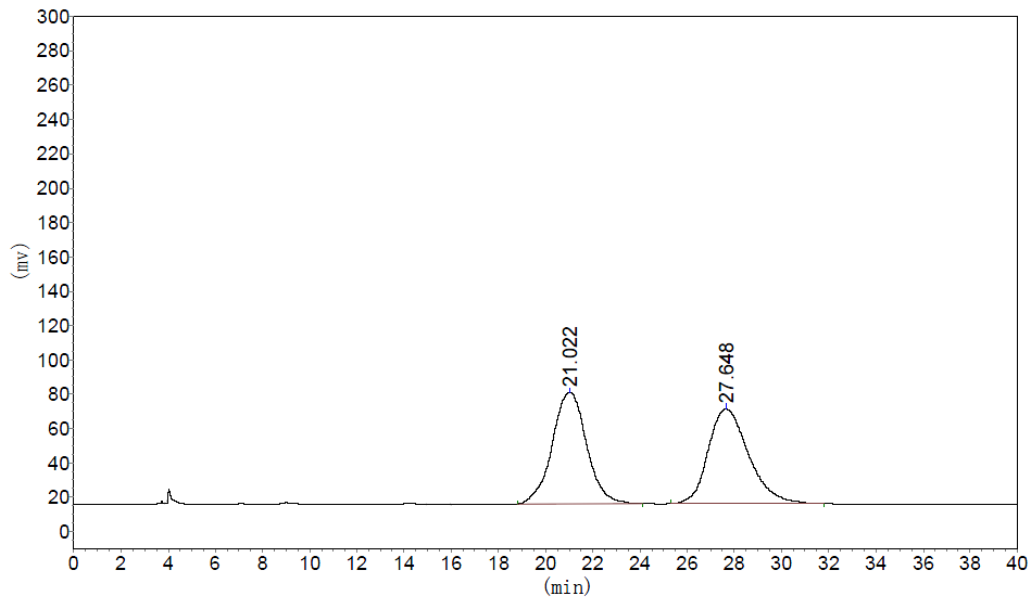

| Peak No.     | R. Time | Peak Height | Peak Area    | Percent  |
|--------------|---------|-------------|--------------|----------|
| 1            | 21.022  | 64812.734   | 6559499.500  | 50.0824  |
| 2            | 27.648  | 55035.203   | 6537922.000  | 49.9176  |
| <b>Total</b> |         | 119847.938  | 13097421.500 | 100.0000 |



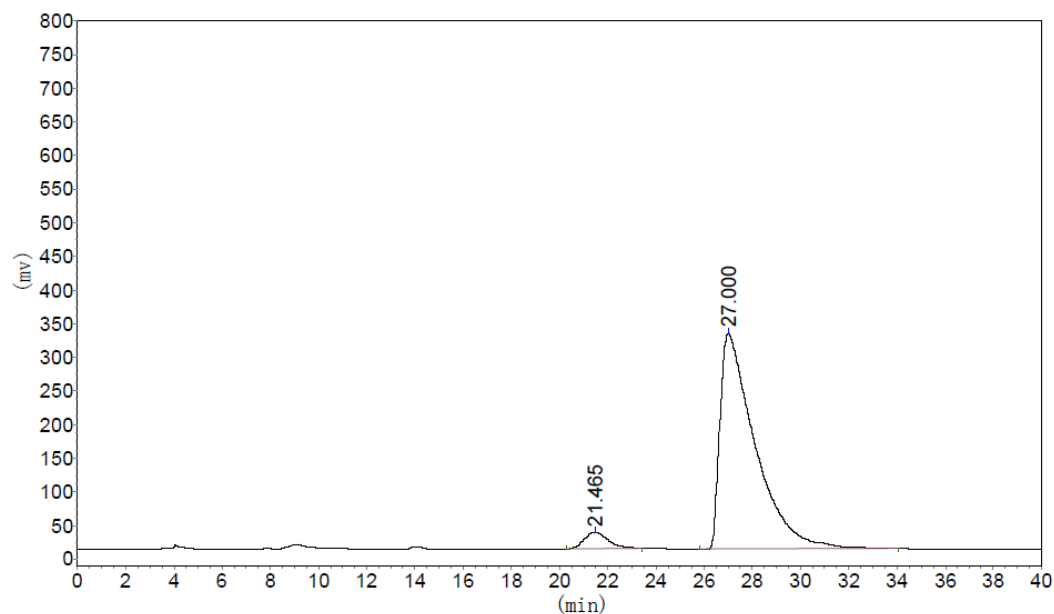

| Peak No.     | R. Time | Peak Height | Peak Area    | Percent  |
|--------------|---------|-------------|--------------|----------|
| 1            | 21.465  | 24167.959   | 1636739.000  | 4.8379   |
| 2            | 27.000  | 319349.500  | 32194760.000 | 95.1621  |
| <b>Total</b> |         | 343517.459  | 33831499.000 | 100.0000 |

2o

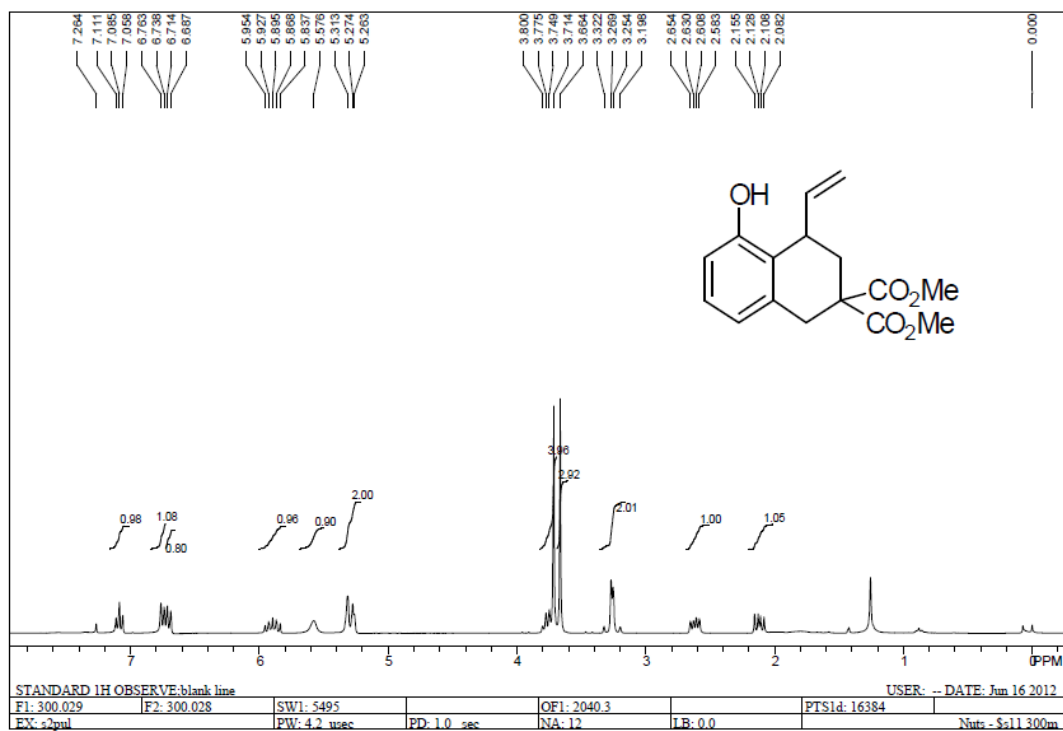

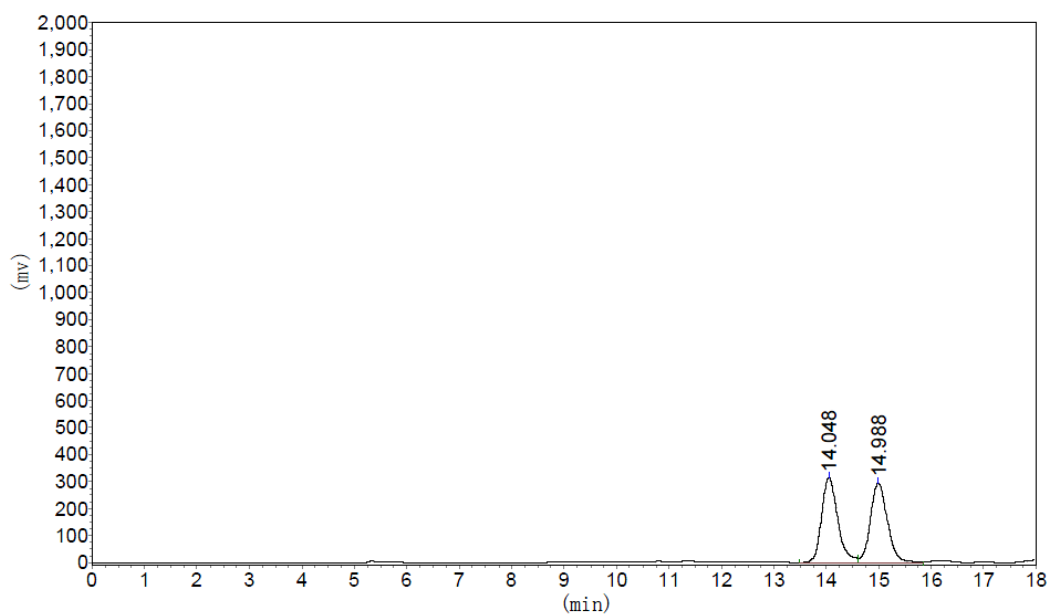

| Peak No.     | R. Time | Peak Height | Peak Area    | Percent  |
|--------------|---------|-------------|--------------|----------|
| 1            | 14.048  | 314464.906  | 6720794.000  | 50.4646  |
| 2            | 14.988  | 294460.781  | 6597050.500  | 49.5354  |
| <b>Total</b> |         | 608925.688  | 13317844.500 | 100.0000 |

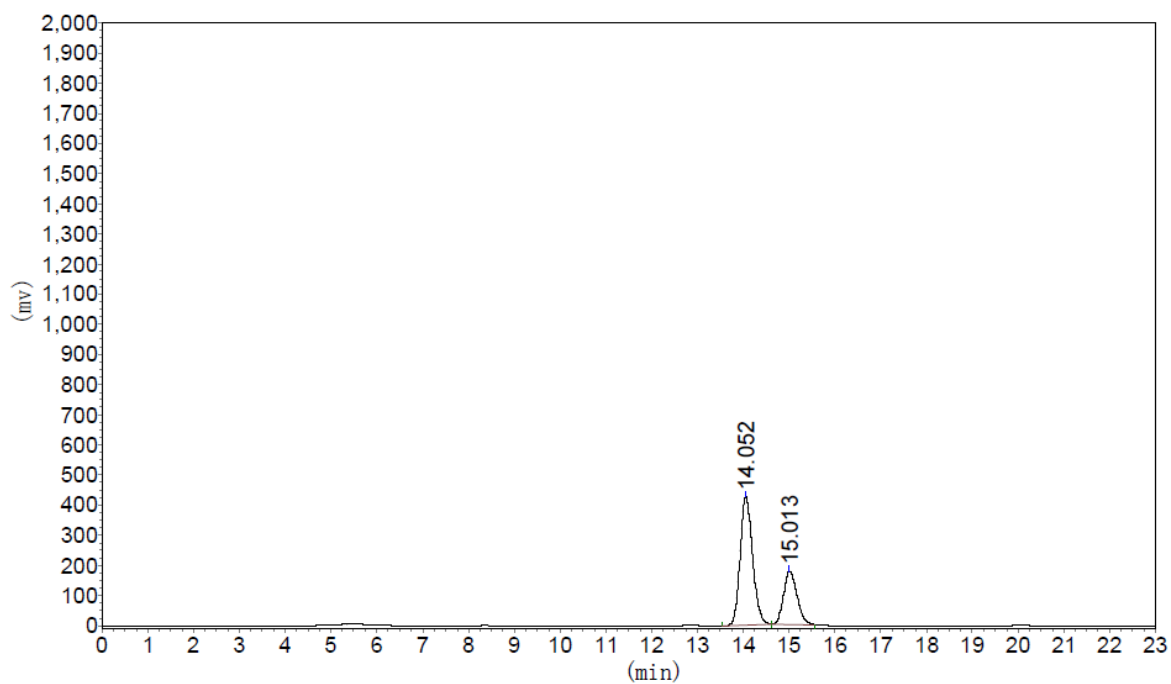

| Peak No.     | R. Time | Peak Height | Peak Area    | Percent  |
|--------------|---------|-------------|--------------|----------|
| 1            | 14.052  | 424222.844  | 8023370.000  | 69.1368  |
| 2            | 15.013  | 177128.672  | 3581699.500  | 30.8632  |
| <b>Total</b> |         | 601351.516  | 11605069.500 | 100.0000 |
